# Supplementary material for: Copper-catalyzed C–C direct cross-coupling: an efficient approach to phenyl-2-(phenylthiophenyl)-methanones
Source: Royal Society of Chemistry journal article supplement (doi:10.1039/c7ra01403a), 2017-01-01

## Electronic Supplementary Information

# Copper-Catalyzed C-C Direct Cross-Coupling: An Efficient Approach to Phenyl-2-(phenylthiophenyl)-methanones

Zhang Qi, Wei Wang, Chong Gao, Rong-Rong Cai, Run-Sheng Xu\*,

Department of Biology and Environment, Zhejiang A&F University, Hangzhou  
311800, Zhejiang China

## Contents

|                                              |            |
|----------------------------------------------|------------|
| <b>Contents.....</b>                         | <b>S1</b>  |
| <b>Experimental Details.....</b>             | <b>S2</b>  |
| <b>Analytical Datas.....</b>                 | <b>S3</b>  |
| <b>Spectral Data of Compounds 3a-3u.....</b> | <b>S3</b>  |
| <b>Spectral Data of Compounds 5a-5g.....</b> | <b>S11</b> |
| <b>Spectrums.....</b>                        | <b>S15</b> |

## Experimental Details

### General Information

All reagents used in the experiment were obtained from commercial sources and used without further purification. Unless otherwise noted, all reactions were carried out at N<sub>2</sub> atmosphere. Thin layer chromatography (TLC) employed glass 0.25 mm silica gel plates. All NMR spectra were recorded on Bruker AVANCE III-400 spectrometer at 400 MHz and 100 MHz for <sup>1</sup>H and <sup>13</sup>C NMR in CDCl<sub>3</sub>, respectively. The NMR chemical shift was reported in ppm relative to 7.26 and 77 ppm of CDCl<sub>3</sub> as the standards of <sup>1</sup>H and <sup>13</sup>C NMR, respectively. The <sup>1</sup>H NMR spectra were reported in delta (δ) units, parts per million (ppm) downfield from the internal standard. Coupling constants are reported in Hertz (Hz). Mass spectras were performed on a Bruker Esquire 3000plus mass spectrometer equipped with ESI interface and ion trap analyzer. The ESI-HRMS were tested on Bruker 7-tesla FT-ICR MS equipped with an electrospray source.

### General procedure for preparation of 3 and 5

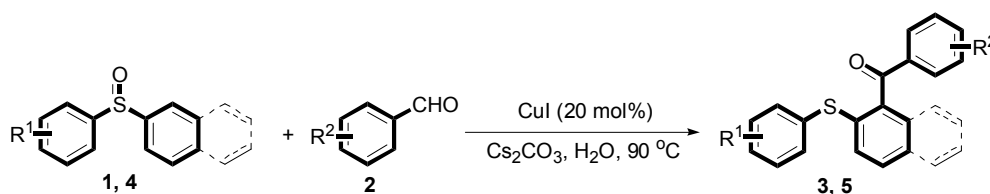

A mixture of 2-benzenesulfinylnaphthalene **1a** (90.7 mg, 0.36 mmol), benzaldehyde **2a** (69 mg, 0.3 mmol), CuI (38.0 mg, 20 mol%) and Cs<sub>2</sub>CO<sub>3</sub> (326.5 mg, 2 equiv) in H<sub>2</sub>O (4 mL) was stirred in N<sub>2</sub> at 90 °C for 10 h. After completion of the reaction, the mixture was quenched with saturated salt water (10 mL), and then the solution was extracted with ethyl acetate (3 × 10 mL). The organic layers were combined and dried by sodium sulfate. The pure product phenyl-(2-phenylsulfanylnaphthalen-1-yl)-methanone **3a** (83.7 mg, 82% yield) was obtained by flash column chromatography on silica gel, washed by cyclohexane/ethyl acetate = 4:1.

### General reaction procedure for 6 and 2a

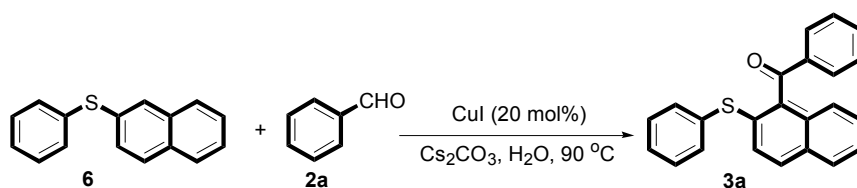

A mixture of 2-phenylsulfanylnaphthalene **6** (85.1 mg, 0.36 mmol), benzaldehyde **2a** (69 mg, 0.3 mmol), CuI (38.0 mg, 20 mol%) and Cs<sub>2</sub>CO<sub>3</sub> (326.5 mg, 2 equiv) in H<sub>2</sub>O (4 mL) was stirred in N<sub>2</sub> at 90 °C for 10 h. After completion of the reaction, the mixture was quenched with saturated salt water (10 mL), and then the solution was extracted with ethyl acetate (3 × 10 mL). The organic layers were combined and dried by sodium sulfate. No product phenyl-(2-phenylsulfanylnaphthalen-1-yl)-methanone **3a** was obtained by flash column chromatography on silica gel, washed by cyclohexane/ethyl acetate = 4:1.

#### General reaction procedure for 1a and 7

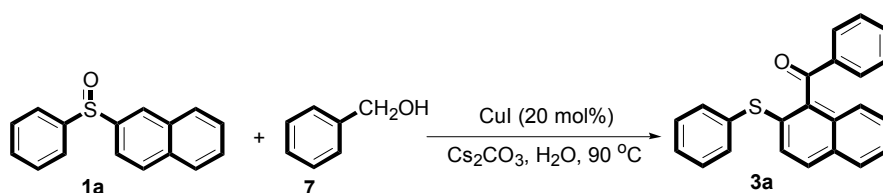

A mixture of 2-benzenesulfinylnaphthalene **1a** (90.7 mg, 0.36 mmol), phenyl-methanol **7** (32.4 mg, 0.3 mmol), CuI (38.0 mg, 20 mol%) and Cs<sub>2</sub>CO<sub>3</sub> (326.5 mg, 2 equiv) in H<sub>2</sub>O (4 mL) was stirred in N<sub>2</sub> at 90 °C for 10 h. After completion of the reaction, the mixture was quenched with saturated salt water (10 mL), and then the solution was extracted with ethyl acetate (3 × 10 mL). The organic layers were combined and dried by sodium sulfate. No product phenyl-(2-phenylsulfanylnaphthalen-1-yl)-methanone **3a** was obtained by flash column chromatography on silica gel, washed by cyclohexane/ethyl acetate = 4:1.

#### General reaction procedure for 6 and 7

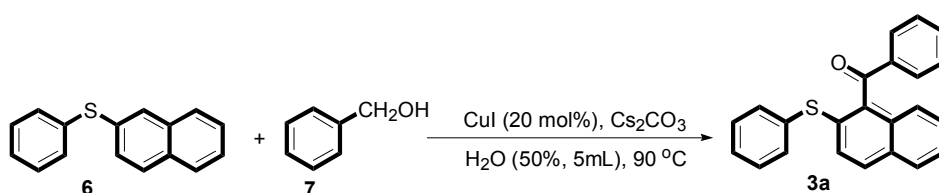

A mixture of 2-phenylsulfanylnaphthalene **6** (85.1 mg, 0.36 mmol), phenyl-methanol **7**, CuI (38.0

mg, 20 mol%) and Cs<sub>2</sub>CO<sub>3</sub> (326.5 mg, 2 equiv) in H<sub>2</sub>O<sub>2</sub> (50%, 5 mL) was stirred in N<sub>2</sub> at 90 °C for 10 h. After completion of the reaction, the mixture was quenched with saturated sodium sulfite water (10 mL), and then the solution was extracted with ethyl acetate (3 × 10 mL). The organic layers were combined and dried by sodium sulfate. The pure product phenyl-(2-phenylsulfanylnaphthalen-1-yl)-methanone **3a** (68.4 mg, 67% yield) was obtained by flash column chromatography on silica gel, washed by cyclohexane/ethyl acetate = 4:1.

## Analytical Datas

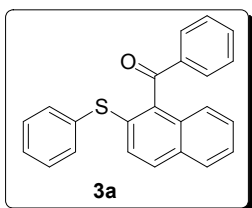

**Phenyl-(2-phenylsulfanylnaphthalen-1-yl)-methanone (3a):** (83.7 mg 82%, cyclohexane/ethyl acetate = 4:1). Pale yellow solid, Mp: 127.6-129.6 °C;

<sup>1</sup>H NMR (400 MHz, CDCl<sub>3</sub>): δ 8.56-8.45 (m, 1 H), 8.06 (d, *J* = 8.0 Hz, 1 H), 8.01-7.92 (m, 1 H), 7.79 (d, *J* = 7.5 Hz, 2 H), 7.64-7.55 (m, 2 H), 7.55-7.48 (m, 2 H), 7.37 (m, 2 H), 7.13-7.06 (m, 2 H), 7.06-6.95 (m, 3 H);

<sup>13</sup>C NMR (100 MHz, CDCl<sub>3</sub>): δ 196.8, 144.8, 137.3, 137.2, 134.4, 134.3, 133.3, 130.6, 129.7, 128.71, 128.66, 128.4, 128.1, 127.3, 127.1, 126.4, 126.3, 125.5, 124.2;

ESI-HRMS *m/z*: Calcd for C<sub>23</sub>H<sub>16</sub>ONaS [M+Na]<sup>+</sup> 363.0820, found 363.0817.

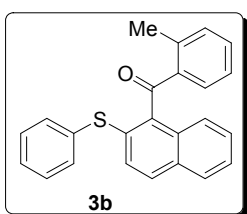

**(2-Phenylsulfanylnaphthalen-1-yl)-o-tolylmethanone (3b):** (84.0 mg 79%, cyclohexane/ethyl acetate = 4:1). Pale yellow solid, Mp: 114.3.4-115.2 °C;

<sup>1</sup>H NMR (400 MHz, CDCl<sub>3</sub>): δ 8.45 (d, *J* = 8.5 Hz, 1 H), 8.06 (d, *J* = 8.4 Hz, 1 H), 7.95 (d, *J* = 8.5 Hz, 1 H), 7.65-7.51 (m, 3 H), 7.34-7.15 (m, 3 H), 7.11-6.95 (m, 4 H), 6.90 (d, *J* = 7.6 Hz, 2 H), 2.66 (s, 3 H);

<sup>13</sup>C NMR (100 MHz, CDCl<sub>3</sub>): δ 199.2, 146.1, 139.7, 137.3, 137.2, 134.6, 134.4, 131.74, 131.66, 131.64, 130.6, 128.63, 128.61, 128.0, 127.3, 126.8, 126.5, 126.3, 125.3, 125.1, 124.8, 21.5;

ESI-HRMS *m/z*: Calcd for C<sub>24</sub>H<sub>18</sub>ONaS [M+Na]<sup>+</sup> 377.0976, found 377.0975.

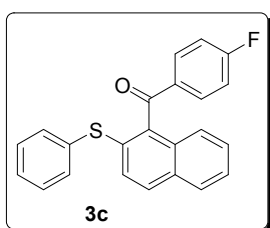

**(4-Fluorophenyl)-(2-phenylsulfanylnaphthalen-1-yl)-methanone (3c):** (92.5 mg 86%,

cyclohexane/ethyl acetate = 4:1). Pale yellow solid, Mp: 87.5-89.2 °C;

<sup>1</sup>H NMR (400 MHz, CDCl<sub>3</sub>): δ 8.54-8.44 (m, 1 H), 8.06 (d, *J* = 8.4 Hz, 1 H), 8.00-7.92 (m, 1 H), 7.80-7.72 (m, 2 H), 7.64-7.55 (m, 2 H), 7.49 (d, *J* = 8.4 Hz, 1 H), 7.12-6.97 (m, 5 H), 6.97-6.91 (m, 2 H);

<sup>13</sup>C NMR (100 MHz, CDCl<sub>3</sub>): δ 195.3, 165.8, 144.4, 137.2, 134.5, 133.7, 132.4, 130.8, 128.8, 128.7, 128.2, 127.4, 127.2, 126.5, 126.3, 125.6, 124.1, 115.5;

ESI-HRMS *m/z*: Calcd for C<sub>23</sub>H<sub>15</sub>ONaSF [M+Na]<sup>+</sup> 381.0725, found 381.0724.

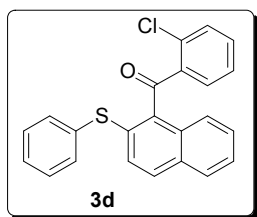

**(2-Chlorophenyl)-(2-phenylsulfanylnaphthalen-1-yl)-methanone (3d):** (91.1 mg 83, 81%, cyclohexane/ethyl acetate = 4:1). Pale yellow solid, Mp: 101.3-103.5 °C;

<sup>1</sup>H NMR (400 MHz, CDCl<sub>3</sub>): δ 8.46 (d, *J* = 8.4 Hz, 1 H), 8.06 (d, *J* = 8.4 Hz, 1 H), 7.95 (d, *J* = 8.4 Hz, 1 H), 7.68 (d, *J* = 8.4 Hz, 1 H), 7.64-7.52 (m, 2 H), 7.40 (dd, *J* = 7.6, 0.8 Hz, 1 H), 7.29-7.20 (m, 2 H), 7.14-7.07 (m, 1 H), 7.07-6.98 (m, 3 H), 6.85-6.77 (m, 2 H);

<sup>13</sup>C NMR (100 MHz, CDCl<sub>3</sub>): δ 196.5, 144.8, 138.1, 137.2, 134.8, 134.7, 132.6, 132.0, 131.3, 130.8, 130.6, 128.6, 128.5, 128.1, 127.7, 126.9, 126.8, 126.5, 126.2, 125.6, 125.2;

ESI-HRMS *m/z*: Calcd for C<sub>23</sub>H<sub>15</sub>ONaSCl [M+Na]<sup>+</sup> 397.0430, found 397.0427.

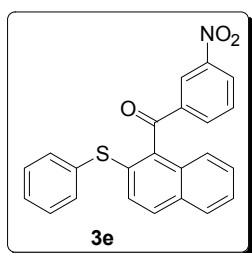

**(3-Nitrophenyl)-(2-phenylsulfanylnaphthalen-1-yl)-methanone (3e):** (105.2 mg 91%, cyclohexane/ethyl acetate = 4:1). Pale yellow solid, Mp: 99.5-101.5 °C;

<sup>1</sup>H NMR (400 MHz, CDCl<sub>3</sub>): δ 8.51-8.44 (m, 1 H), 8.35-8.30 (m, 1 H), 8.30-8.23 (m, 1 H), 8.17-8.08 (m, 2 H), 8.05-7.97 (m, 1 H), 7.70-7.59 (m, 2 H), 7.58-7.47 (m, 2 H), 7.09-6.94 (m, 3 H), 6.86-6.76 (m, 2 H);

<sup>13</sup>C NMR (100 MHz, CDCl<sub>3</sub>): δ 194.9, 147.9, 143.1, 138.9, 136.7, 134.8, 134.7, 134.5, 131.4, 129.5,

128.8, 128.6, 127.9, 127.2, 126.7, 126.5, 126.4, 125.7, 124.2;

ESI-HRMS  $m/z$ : Calcd for  $C_{23}H_{15}NO_3SNa$   $[M+Na]^+$  408.0670, found 408.0667.

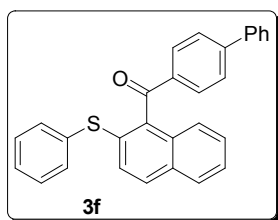

**(2-phenylsulfonylnaphthalen-1-yl)-4-phenylmethanone (3f):** (100.0 mg 80%, cyclohexane/ethyl acetate = 4:1). Pale yellow solid, Mp: 125.5-126.5 °C;

$^1H$  NMR (400 MHz,  $CDCl_3$ ):  $\delta$  8.57-8.47 (m, 1 H), 8.08 (d,  $J$  = 8.4 Hz, 1 H), 8.03-7.93 (m, 1 H), 7.84 (d,  $J$  = 8.4 Hz, 2 H), 7.69-7.52 (m, 7 H), 7.52-7.35 (m, 3 H), 7.15-6.94 (m, 5 H);

$^{13}C$  NMR (100 MHz,  $CDCl_3$ ):  $\delta$  196.4, 145.9, 144.9, 139.9, 137.4, 136.0, 134.6, 134.4, 130.7, 130.3, 128.9, 128.8, 128.7, 128.2, 128.1, 127.3, 127.2, 127.0, 126.5, 126.3, 125.5, 124.3;

ESI-HRMS  $m/z$ : Calcd for  $C_{29}H_{20}ONaS$   $[M+Na]^+$  439.1133, found 439.1129.

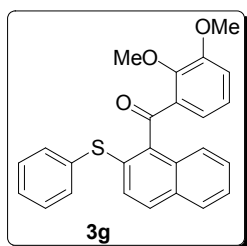

**(2-phenylsulfonylnaphthalen-1-yl)-3,4-dimethoxybenzoyl methanone (3g):** (92.5 mg 77%, cyclohexane/ethyl acetate = 4:1). Pale yellow solid, Mp: 144.5-145.5 °C;

$^1H$  NMR (400 MHz,  $CDCl_3$ ):  $\delta$  8.45 (d,  $J$  = 8.4 Hz, 1 H), 7.96 (d,  $J$  = 8.8 Hz, 1 H), 7.89 (d,  $J$  = 7.6 Hz, 1 H), 7.75 (d,  $J$  = 8.8 Hz, 1 H), 7.58-7.43 (m, 2 H), 7.13 (t,  $J$  = 8.4 Hz, 1 H), 7.05-6.90 (m, 3 H), 6.81-6.72 (m, 2 H), 6.37 (d,  $J$  = 8.4 Hz, 2 H), 3.60 (s, 6 H);

$^{13}C$  NMR (100 MHz,  $CDCl_3$ ):  $\delta$  196.7, 158.0, 146.3, 138.5, 134.8, 134.5, 131.5, 130.0, 128.4, 128.3, 127.6, 127.4, 127.3, 126.4, 126.3, 126.2, 124.5, 119.9, 103.9, 55.7;

ESI-HRMS  $m/z$ : Calcd for  $C_{25}H_{20}O_3NaS$   $[M+Na]^+$  423.1031, found 423.1030.

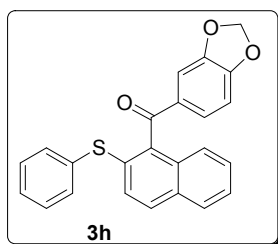

**Benzo[1,3]dioxol-5-yl-(2-phenylsulfanyl-naphthalen-1-yl)-methanone (3h):** (89.9 mg 78%, cyclohexane/ethyl acetate = 4:1). Pale yellow solid, Mp: 120.9-123.0 °C;

<sup>1</sup>H NMR (400 MHz, CDCl<sub>3</sub>): δ 8.51-8.41 (m, 1 H), 8.03 (d, *J* = 8.4 Hz, 1 H), 7.98-7.91 (m, 1 H), 7.63-7.52 (m, 2 H), 7.48 (d, *J* = 8.0 Hz, 1 H), 7.37 (d, *J* = 1.6 Hz, 1 H), 7.23-7.16 (m, 1 H), 7.14-7.06 (m, 2 H), 7.06-6.94 (m, 3 H), 6.69 (dd, *J* = 8.0, 2.4 Hz, 1 H), 6.02 (s, 2 H);

<sup>13</sup>C NMR (100 MHz, CDCl<sub>3</sub>): δ 195.0, 152.1, 148.1, 145.0, 137.4, 134.4, 134.3, 132.2, 130.6, 128.73, 128.67, 128.1, 127.3, 127.19, 127.16, 126.5, 126.1, 125.5, 124.1, 108.7, 107.7, 101.9;

ESI-HRMS *m/z*: Calcd for C<sub>24</sub>H<sub>16</sub>O<sub>3</sub>NaS [M+Na]<sup>+</sup> 407.0718, found 407.0715.

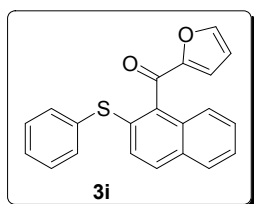

**Furan-2-yl(2-phenylsulfanylnaphthalen-1-yl)methanone (3i):** (84.3 mg 85%, cyclohexane/ethyl acetate = 4:1). Pale yellow solid, Mp: 115.5-116.5 °C;

<sup>1</sup>H NMR (400 MHz, CDCl<sub>3</sub>): δ 8.52-8.42 (m, 1 H), 8.03 (d, *J* = 8.4 Hz, 1 H), 7.99-7.90 (m, 1 H), 7.65-7.50 (m, 4 H), 7.15-7.06 (m, 2 H), 7.06-6.97 (m, 3 H), 6.94 (d, *J* = 3.6 Hz, 1 H), 6.50-6.43 (m, 1 H);

<sup>13</sup>C NMR (100 MHz, CDCl<sub>3</sub>): δ 184.2, 152.8, 147.5, 143.5, 137.4, 134.6, 134.3, 130.5, 128.74, 128.67, 128.1, 127.4, 127.3, 127.2, 126.7, 125.6, 124.2, 120.4, 112.5;

ESI-HRMS *m/z*: Calcd for C<sub>21</sub>H<sub>14</sub>O<sub>2</sub>NaS [M+Na]<sup>+</sup> 353.0612, found 353.0613.

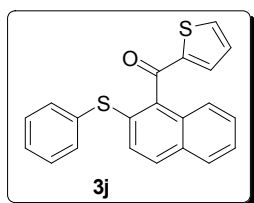

**(2-Phenylsulfanylnaphthalen-1-yl)thiophen-2-yl-methanone (3j):** (87.3 mg 84%, cyclohexane/ethyl acetate = 4:1). Pale yellow solid, Mp: 116.0-116.5 °C;

<sup>1</sup>H NMR (400 MHz, CDCl<sub>3</sub>): δ 8.54-8.44 (m, 1 H), 8.03 (d, *J* = 8.4 Hz, 1 H), 7.98-7.90 (m, 1 H), 7.69 (d, *J* = 5.2 Hz, 1 H), 7.62-7.51 (m, 3 H), 7.26 (s, 1 H), 7.13-7.06 (m, 2 H), 7.06-6.96 (m, 4 H);

<sup>13</sup>C NMR (100 MHz, CDCl<sub>3</sub>): δ 188.9, 144.7, 144.6, 137.5, 135.3, 135.1, 134.5, 134.4, 130.5, 128.8, 128.7, 128.11, 128.08, 127.41, 127.35, 126.7, 125.6, 124.0;

ESI-HRMS *m/z*: Calcd for C<sub>21</sub>H<sub>14</sub>ONaS<sub>2</sub> [M+Na]<sup>+</sup> 369.0384, found 369.0385.



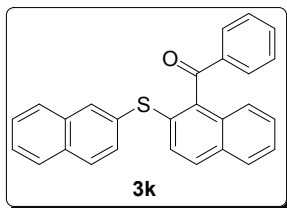

**[2-(Naphthalen-2-ylsulfanyl)naphthalen-1-yl]phenyl-methanone (3k):** (97.2 mg 83%, cyclohexane/ethyl acetate = 4:1). Pale yellow solid, Mp: 145.5-147.5 °C;

<sup>1</sup>H NMR (400 MHz, CDCl<sub>3</sub>): δ 8.55-8.45 (m, 1 H), 8.09 (d, *J* = 8.0 Hz, 1 H), 8.05-7.96 (m, 3 H), 7.85 (d, *J* = 8.0 Hz, 2 H), 7.70 (d, *J* = 8.4 Hz, 1 H), 7.66-7.53 (m, 4 H), 7.46 (m, 1 H), 7.07-6.98 (m, 2 H), 6.98-6.90 (m, 3 H);

<sup>13</sup>C NMR (100 MHz, CDCl<sub>3</sub>): δ 196.9, 145.0, 137.3, 135.6, 134.7, 134.6, 134.4, 132.7, 132.2, 130.8, 129.6, 128.73, 128.67, 128.6, 128.5, 128.2, 127.7, 127.3, 127.1, 126.6, 126.5, 126.4, 125.6, 124.41, 124.39;

ESI-HRMS *m/z*: Calcd for C<sub>27</sub>H<sub>18</sub>ONaS [M+Na]<sup>+</sup> 413.0976, found 413.0974.

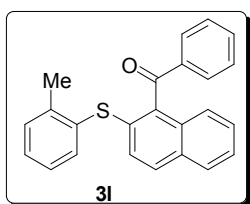

**Phenyl-(2-o-tolylsulfanyl)naphthalen-1-yl)-methanone (3l):** (92.5 mg 87%, cyclohexane/ethyl acetate = 4:1). Pale yellow solid, Mp: 100.5-102.5 °C;

<sup>1</sup>H NMR (400 MHz, CDCl<sub>3</sub>): δ 8.38 (d, *J* = 8.0 Hz, 1 H), 8.06 (d, *J* = 8.4 Hz, 1 H), 7.97 (d, *J* = 9.2 Hz, 1 H), 7.79-7.67 (m, 2 H), 7.64-7.54 (m, 2 H), 7.54-7.44 (m, 2 H), 7.33 (m, 2 H), 7.02 (d, *J* = 7.2 Hz, 1 H), 6.93 (m, 1 H), 6.83 (d, *J* = 7.6 Hz, 1 H), 6.53 (d, *J* = 7.6 Hz, 1 H), 2.26 (s, 3 H);

<sup>13</sup>C NMR (100 MHz, CDCl<sub>3</sub>): δ 196.8, 144.8, 137.1, 136.6, 135.0, 134.6, 134.4, 133.2, 130.5, 129.8, 129.7, 128.7, 128.2, 128.1, 127.3, 126.9, 126.6, 126.5, 126.3, 125.2, 124.5, 20.0;

ESI-HRMS *m/z*: Calcd for C<sub>24</sub>H<sub>18</sub>ONaS [M+Na]<sup>+</sup> 377.0976, found 377.0973.

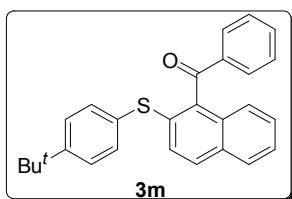

**Phenyl-(2-p-tolylsulfanyl)naphthalen-1-yl)-methanone (3m):** (87.6 mg 86%, cyclohexane/ethyl acetate = 4:1). Pale yellow solid, Mp: 106.8-107.6 °C;

$^1\text{H}$  NMR (400 MHz,  $\text{CDCl}_3$ ):  $\delta$  8.60-8.49 (m, 1 H), 8.03 (d,  $J = 8.4$  Hz, 1 H), 7.99-7.90 (m, 1 H), 7.73 (d,  $J = 8.4$  Hz, 2 H), 7.65-7.55 (m, 2 H), 7.54-7.43 (m, 2 H), 7.33 (m, 2 H), 7.09 (d,  $J = 8.4$  Hz, 2 H), 6.90 (d,  $J = 8.4$  Hz, 2 H), 1.20 (s, 9 H);

$^{13}\text{C}$  NMR (100 MHz,  $\text{CDCl}_3$ ):  $\delta$  196.9, 148.7, 144.7, 137.2, 134.7, 134.4, 133.7, 133.2, 130.5, 129.8, 128.6, 128.3, 128.0, 127.23, 127.20, 126.9, 126.6, 125.8, 124.2, 34.3, 31.2;

ESI-HRMS  $m/z$ : Calcd for  $\text{C}_{27}\text{H}_{24}\text{ONaS}$   $[\text{M}+\text{Na}]^+$  419.1446, found 419.1447.

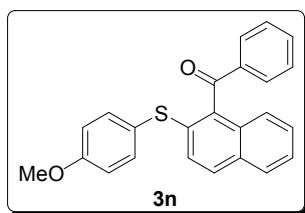

**[2-(4-Methoxyphenylsulfanyl)-naphthalen-1-yl]-phenylmethanone (3n)**: (97.8 mg 88%, cyclohexane/ethyl acetate = 2:1). Pale yellow solid, Pale yellow oil;

$^1\text{H}$  NMR (400 MHz,  $\text{CDCl}_3$ ):  $\delta$  8.58-8.52 (m, 1 H), 8.00 (d,  $J = 8.4$  Hz, 1 H), 7.96-7.90 (m, 1 H), 7.80-7.73 (m, 2 H), 7.62-7.56 (m, 2 H), 7.56-7.50 (m, 1 H), 7.46 (d,  $J = 8.4$  Hz, 1 H), 7.41-7.35 (m, 2 H), 7.02 (d,  $J = 9.2$  Hz, 2 H), 6.65 (d,  $J = 8.8$  Hz, 1 H), 3.68 (s, 3 H);

$^{13}\text{C}$  NMR (100 MHz,  $\text{CDCl}_3$ ):  $\delta$  197.0, 158.2, 144.2, 137.3, 134.4, 134.3, 133.3, 130.2, 130.1, 129.9, 128.6, 128.4, 128.1, 127.9, 127.7, 127.2, 126.5, 124.2, 114.5, 55.2;

ESI-HRMS  $m/z$ : Calcd for  $\text{C}_{24}\text{H}_{19}\text{O}_2\text{S}$   $[\text{M}+\text{H}]^+$  371.1100, found 371.1107.

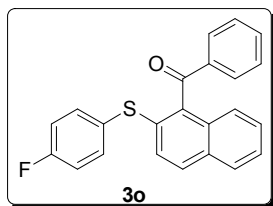

**[2-(4-Fluorophenylsulfanyl)-naphthalen-1-yl]-phenylmethanone (3o)**: (80.6 mg 75%, cyclohexane/ethyl acetate = 2:1). Pale yellow solid, Mp: 106.8-109.5  $^\circ\text{C}$ ;

$^1\text{H}$  NMR (400 MHz,  $\text{CDCl}_3$ ):  $\delta$  8.52-8.45 (m, 1 H), 8.04 (d,  $J = 8.4$  Hz, 1 H), 7.99-7.93 (m, 1 H), 7.76 (d,  $J = 8.4$  Hz, 2 H), 7.64-7.57 (m, 2 H), 7.57-7.51 (m, 1 H), 7.49 (d,  $J = 8.4$  Hz, 1 H), 7.38 (m, 2 H), 7.02-6.95 (m, 2 H), 6.83-6.75 (m, 2 H);

$^{13}\text{C}$  NMR (100 MHz,  $\text{CDCl}_3$ ):  $\delta$  196.8, 161.2, 144.7, 137.1, 134.4, 133.4, 132.2, 130.7, 129.8, 129.5, 128.8, 128.4, 128.2, 127.3, 126.8, 126.3, 124.2, 116.0, 115.8;

ESI-HRMS  $m/z$ : Calcd for  $\text{C}_{23}\text{H}_{16}\text{OF}$   $[\text{M}+\text{H}]^+$  359.0900, found 359.0905.

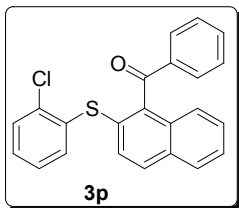

**[2-(2-Chlorophenylsulfanyl)-naphthalen-1-yl]-phenylmethanone (3p):** (88.9 mg 79%, cyclohexane/ethyl acetate = 2:1). Pale yellow solid, Mp: 119.5-120.8 °C;

<sup>1</sup>H NMR (400 MHz, CDCl<sub>3</sub>): δ 8.36 (d, *J* = 8.4 Hz, 1 H), 8.07 (d, *J* = 8.4 Hz, 1 H), 7.95 (d, *J* = 7.2 Hz, 1 H), 7.75 (d, *J* = 8.0 Hz, 2 H), 7.62-7.43 (m, 4 H), 7.33 (m, 2 H), 7.21 (dd, *J* = 8.0, 1.2 Hz, 1 H), 6.93 (dd, *J* = 7.6, 1.6 Hz, 1 H), 6.85 (dd, *J* = 8.0, 1.6 Hz, 1 H), 6.50 (d, *J* = 8.0 Hz, 2 H);

<sup>13</sup>C NMR (100 MHz, CDCl<sub>3</sub>): δ 196.5, 145.4, 136.9, 136.6, 134.3, 133.4, 131.1, 130.8, 129.7, 129.2, 128.7, 128.38, 128.37, 127.8, 127.4, 126.9, 126.13, 126.10, 125.0, 124.3;

ESI-HRMS *m/z*: Calcd for C<sub>23</sub>H<sub>16</sub>OClS [M+H]<sup>+</sup> 375.0605, found 375.0611.

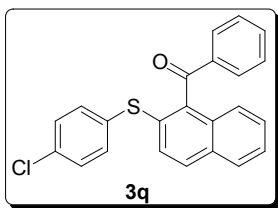

**[2-(4-Chlorophenylsulfanyl)-naphthalen-1-yl]-phenylmethanone (3q):** (78.7 mg 70%, cyclohexane/ethyl acetate = 4:1). Pale yellow solid, Mp: 115.5-116.2 °C;

<sup>1</sup>H NMR (400 MHz, CDCl<sub>3</sub>): δ 8.48-8.39 (m, 1 H), 8.06 (d, *J* = 8.4 Hz, 1 H), 8.01-7.92 (m, 1 H), 7.76 (d, *J* = 7.2 Hz, 2 H), 7.65-7.57 (m, 2 H), 7.57-7.47 (m, 2 H), 7.38 (m, 2 H), 7.09-7.00 (m, 2 H), 6.95-6.85 (m, 2 H);

<sup>13</sup>C NMR (100 MHz, CDCl<sub>3</sub>): δ 196.7, 144.9, 137.0, 135.8, 134.4, 134.3, 133.5, 131.5, 130.9, 129.8, 128.9, 128.8, 128.5, 128.3, 127.4, 126.2, 125.8, 124.2;

ESI-HRMS *m/z*: Calcd for C<sub>23</sub>H<sub>15</sub>ONaSCl [M+Na]<sup>+</sup> 397.0430, found 397.0432.

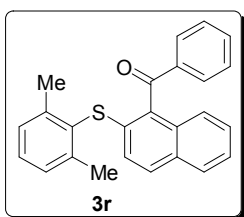

**[2-(2,6-Dimethylphenylsulfanyl)-naphthalen-1-yl]-phenylmethanone (3r):** (89.5 mg 81%, cyclohexane/ethyl acetate = 4:1). Pale yellow solid, Mp: 153.9-156.5 °C;

$^1\text{H}$  NMR (400 MHz,  $\text{CDCl}_3$ ):  $\delta$  8.66-8.58 (m, 1 H), 7.92-7.86 (m, 1 H), 7.80 (d,  $J = 8.0$  Hz, 1 H), 7.63-7.53 (m, 4 H), 7.50-7.43 (m, 1 H), 7.35-7.23 (m, 3 H), 6.84-6.72 (m, 3 H), 2.01 (s, 6 H);

$^{13}\text{C}$  NMR (100 MHz,  $\text{CDCl}_3$ ):  $\delta$  195.8, 141.5, 138.6, 135.9, 134.0, 133.1, 133.0, 132.7, 129.8, 128.6, 128.2, 128.0, 127.22, 127.16, 127.13, 125.5, 125.4, 21.7;

ESI-HRMS  $m/z$ : Calcd for  $\text{C}_{25}\text{H}_{21}\text{OS}$   $[\text{M}+\text{H}]^+$  369.1308, found 369.1314.

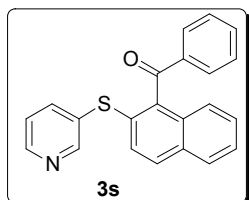

**Phenyl-[2-(pyridin-3-ylsulfanyl)-naphthalen-1-yl]-methanone (3s):** (81.9 mg 80%, cyclohexane/ethyl acetate = 4:1). Pale yellow solid, Mp: 119.8-123.0  $^\circ\text{C}$ ;

$^1\text{H}$  NMR (400 MHz,  $\text{CDCl}_3$ ):  $\delta$  8.33 (dd,  $J = 8.0, 1.2$  Hz, 1 H), 8.32-8.15 (br, 2 H), 8.14 (d,  $J = 8.0$  Hz, 1 H), 8.01 (dd,  $J = 7.6, 1.6$  Hz, 1 H), 7.74 (dd,  $J = 8.0, 1.2$  Hz, 2 H), 7.69-7.58 (m, 2 H), 7.58-7.50 (m, 2 H), 7.37 (m, 2 H), 6.83-6.67 (m, 2 H);

$^{13}\text{C}$  NMR (100 MHz,  $\text{CDCl}_3$ )  $\delta$ : 196.2, 149.0, 148.6, 145.5, 136.8, 134.3, 134.2, 133.6, 131.6, 129.7, 128.9, 128.7, 128.5, 127.6, 125.8, 124.3, 122.7, 120.89;

ESI-HRMS  $m/z$ : Calcd for  $\text{C}_{22}\text{H}_{16}\text{ONS}$   $[\text{M}+\text{H}]^+$  342.0947, found 342.0950.

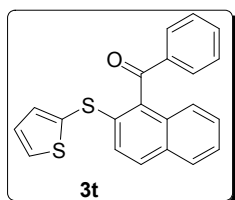

**Phenyl-[2-(thiophen-2-ylsulfanyl)-naphthalen-1-yl]-methanone (3t):** (86.3 mg 83%, cyclohexane/ethyl acetate = 4:1). Pale yellow solid, Mp: 96.5-97.5  $^\circ\text{C}$ ;

$^1\text{H}$  NMR (400 MHz,  $\text{CDCl}_3$ ):  $\delta$  8.78 (d,  $J = 8.4$  Hz, 1 H), 7.98 (d,  $J = 8.4$  Hz, 1 H), 7.92 (d,  $J = 8.0$  Hz, 1 H), 7.82 (d,  $J = 8.0$  Hz, 2 H), 7.71-7.64 (m, 1 H), 7.64-7.53 (m, 2 H), 7.46-7.38 (m, 3 H), 7.10 (dd,  $J = 5.2, 1.2$  Hz, 1 H), 6.94 (d,  $J = 7.6$  Hz, 1 H), 6.79-6.71 (m, 1 H);

$^{13}\text{C}$  NMR (100 MHz,  $\text{CDCl}_3$ ):  $\delta$  196.8, 143.4, 137.2, 134.7, 134.4, 133.9, 133.4, 131.7, 130.3, 130.0, 129.1, 128.7, 128.4, 128.1, 127.9, 127.2, 126.9, 126.3, 124.1;

ESI-HRMS  $m/z$ : Calcd for  $\text{C}_{21}\text{H}_{15}\text{OS}_2$   $[\text{M}+\text{H}]^+$  347.0559, found 347.0563.

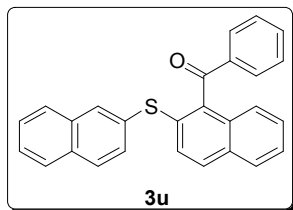

**[2-(Naphthalen-2-ylsulfanyl)-naphthalen-1-yl]-phenylmethanone (3u):** (90.2 mg 77%, cyclohexane/ethyl acetate = 4:1). Pale yellow solid, Mp: 136.4-138.0 °C;

<sup>1</sup>H NMR (400 MHz, CDCl<sub>3</sub>): δ 8.51(d, *J* = 8.4 Hz, 1 H), 8.08 (d, *J* = 8.4 Hz, 1 H), 7.97(d, *J* = 8.8 Hz, 1 H), 7.78 (d, *J* = 8.4 Hz, 2 H), 7.72-7.64 (m, 1 H), 7.63-7.50 (m, 5 H), 7.47 (t, *J* = 7.4 Hz, 1 H), 7.43-7.28 (m, 5 H), 7.10 (dd, *J* = 8.4, 1.6 Hz, 1 H);

<sup>13</sup>C NMR (100 MHz, CDCl<sub>3</sub>): δ 196.8, 144.8, 137.2, 134.7, 134.5, 134.4, 133.5, 133.3, 131.5, 130.7, 129.8, 128.7, 128.4, 128.3, 128.2, 127.6, 127.3, 127.1, 126.5, 126.3, 125.6, 125.5, 125.4, 124.3;

ESI-HRMS *m/z*: Calcd for C<sub>27</sub>H<sub>18</sub>ONaS [M+Na]<sup>+</sup> 413.0976, found 413.0975.

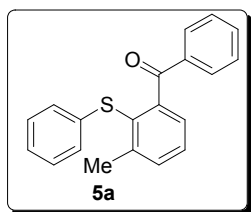

**(3-Methyl-2-phenylsulfanylphenyl)-phenylmethanone (5a):** (72.1 mg, 79%, cyclohexane/ethyl acetate = 4:1). Pale yellow solid, Mp: 50.0-52.5 °C;

<sup>1</sup>H NMR (400 MHz, CDCl<sub>3</sub>): δ 7.85 (d, *J* = 7.2 Hz, 2 H), 7.65-7.58 (m, 1 H), 7.54 (d, *J* = 4.8 Hz, 2 H), 7.48 (d, *J* = 7.6 Hz, 2 H), 7.40-7.33 (m, 1 H), 7.28-7.20 (m, 2 H), 7.19-7.13 (m, 1 H), 7.10-7.04 (m, 2 H), 2.50 (s, 3 H);

<sup>13</sup>C NMR (100 MHz, CDCl<sub>3</sub>) δ 196.8, 146.5, 144.2, 137.3, 136.9, 133.1, 132.0, 129.8, 129.3, 128.8, 128.6, 128.3, 127.2, 125.49, 125.45, 20.8;

ESI-HRMS *m/z*: Calcd for C<sub>20</sub>H<sub>16</sub>ONaS [M+Na]<sup>+</sup> 327.0820, found 327.0823.

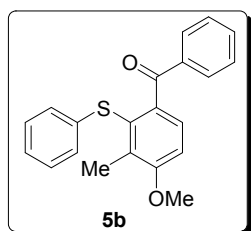

**(4-Methoxy-3-methyl-2-phenylsulfanylphenyl)-phenylmethanone (5b):** (78.2 mg, 78%,

cyclohexane/ethyl acetate = 4:1). Pale yellow oil;

$^1\text{H}$  NMR (400 MHz,  $\text{CDCl}_3$ ):  $\delta$  7.74-7.66 (m, 2 H), 7.63-7.46 (m, 1 H), 7.37-7.29 (m, 3 H), 7.15-7.00 (m, 6 H), 3.78 (s, 3 H), 2.38 (s, 3 H);

$^{13}\text{C}$  NMR (100 MHz,  $\text{CDCl}_3$ ):  $\delta$  196.1, 160.1, 144.2, 137.2, 137.0, 134.3, 133.1, 132.2, 129.8, 128.6, 128.2, 125.9, 124.6, 123.6, 60.5, 16.7;

ESI-HRMS  $m/z$ : Calcd for  $\text{C}_{21}\text{H}_{18}\text{O}_2\text{NaS}$   $[\text{M}+\text{Na}]^+$  357.0925, found 357.0927.

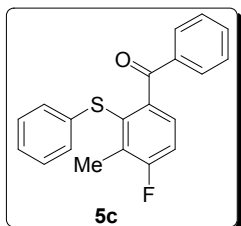

**(4-Fluoro-3-methyl-2-phenylsulfanylphenyl)-phenylmethanone (5c):** (79.8 mg, 80%, cyclohexane/ethyl acetate = 4:1). Pale yellow oil;

$^1\text{H}$  NMR (400 MHz,  $\text{CDCl}_3$ ):  $\delta$  7.72 (d,  $J = 8.4$  Hz, 2 H), 7.52 (d,  $J = 7.4$  Hz, 1 H), 7.38 (dd,  $J = 7.6$  Hz, 2 H), 7.30-7.19 (m, 2 H), 7.19-7.11 (m, 2 H), 7.11-7.05 (m, 1 H), 6.97 (d,  $J = 8.4$  Hz, 2 H), 2.30 (d,  $J = 2.8$  Hz, 3 H);

$^{13}\text{C}$  NMR (100 MHz,  $\text{CDCl}_3$ ):  $\delta$  196.1, 161.9, 142.0, 137.3, 136.2, 133.3, 131.9, 131.1, 129.8, 128.9, 128.4, 127.5, 126.4, 125.9, 116.2, 12.6;

ESI-HRMS  $m/z$ : Calcd for  $\text{C}_{20}\text{H}_{15}\text{ONaSF}$   $[\text{M}+\text{Na}]^+$  345.0725, found 345.0724.

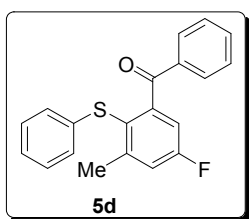

**(5-Fluoro-3-methyl-2-phenylsulfanylphenyl)-phenylmethanone (5d):** (79.3 mg, 82%, cyclohexane/ethyl acetate = 4:1). Pale yellow oil;

$^1\text{H}$  NMR (400 MHz,  $\text{CDCl}_3$ ):  $\delta$  7.73 (d,  $J = 8.4$  Hz, 2 H), 7.53 (dd,  $J = 7.4$  Hz, 1 H), 7.38 (dd,  $J = 7.6$  Hz, 2 H), 7.20-7.10 (m, 3 H), 7.10-7.03 (m, 1 H), 6.99 (dd,  $J = 8.0, 2.8$  Hz, 1 H), 6.94-6.92 (m, 2 H), 2.39 (s, 3 H);

$^{13}\text{C}$  NMR (100 MHz,  $\text{CDCl}_3$ ):  $\delta$  195.3, 162.8, 148.4, 147.3, 136.64, 136.58, 133.5, 129.8, 128.8, 128.6, 128.4, 126.9, 125.6, 123.8, 118.8, 112.6, 21.1;

ESI-HRMS  $m/z$ : Calcd for  $C_{20}H_{15}FOS$   $[M+Na]^+$  345.0725, found 345.0721.

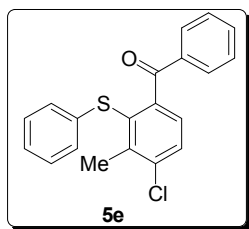

**(4-Chloro-3-methyl-2-phenylsulfanylphenyl)-phenylmethanone (5e):** (84.4 mg, 83%, cyclohexane/ethyl acetate = 4:1). Pale yellow solid, Mp: 66.0-68.9 °C;

$^1H$  NMR (400 MHz,  $CDCl_3$ ):  $\delta$  7.72 (d,  $J = 8.4$  Hz, 2 H), 7.58-7.48 (m, 2 H), 7.38 (t,  $J = 7.8$  Hz, 2 H), 7.23-7.11 (m, 3 H), 7.11-7.03 (m, 1 H), 7.00-6.93 (m, 2 H), 2.49 (s, 3 H);

$^{13}C$  NMR (100 MHz,  $CDCl_3$ ):  $\delta$  195.8, 145.0, 142.0, 137.0, 136.8, 136.2, 133.4, 130.9, 130.3, 129.7, 128.9, 128.4, 127.4, 125.9, 125.8, 18.3;

ESI-HRMS  $m/z$ : Calcd for  $C_{20}H_{15}ONaSCl$   $[M+Na]^+$  361.0430, found 361.0433.

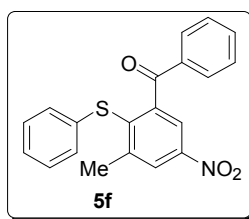

**(3-Methyl-5-nitro-2-phenylsulfanylphenyl)-phenylmethanone (5f):** (89.1 mg, 85%, cyclohexane/ethyl acetate = 4:1). Pale yellow oil;

$^1H$  NMR (400 MHz,  $CDCl_3$ ):  $\delta$  8.23 (d,  $J = 2.4$  Hz, 1 H), 8.08 (d,  $J = 2.0$  Hz, 1 H), 7.72 (d,  $J = 8.4$  Hz, 2 H), 7.62-7.54 (m, 1 H), 7.42 (t,  $J = 7.8$  Hz, 2 H), 7.21-7.08 (m, 3 H), 7.06-6.98 (m, 2 H), 2.44 (s, 3 H);

$^{13}C$  NMR (100 MHz,  $CDCl_3$ ):  $\delta$  194.3, 147.3, 146.3, 145.4, 138.6, 136.1, 134.5, 134.0, 129.8, 129.2, 129.0, 128.6, 126.9, 125.9, 120.3, 21.5;

ESI-HRMS  $m/z$ : Calcd for  $C_{20}H_{16}NO_3S$   $[M+H]^+$  350.0851, found 350.0849.

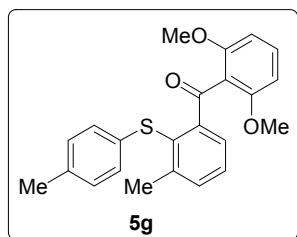

**(2,6-Dimethoxyphenyl)-(3-methyl-2-p-tolylsulfanylphenyl)-methanone (5g):** (90.8 mg, 80%,

cyclohexane/ethyl acetate = 4:1). Pale yellow solid, Mp: 132.1-132.6 °C;

<sup>1</sup>H NMR (400 MHz, CDCl<sub>3</sub>): δ 7.44 (dd, *J* = 7.6, 1.6 Hz, 1 H), 7.36-7.25 (m, 2 H), 7.21 (dd, *J* = 8.4 Hz, 1 H), 6.93 (d, *J* = 8.4 Hz, 2 H), 6.85 (d, *J* = 8.0 Hz, 2 H), 6.47 (d, *J* = 8.4 Hz, 2 H), 3.64 (s, 6 H), 2.28 (s, 3 H), 2.25 (s, 3 H);

<sup>13</sup>C NMR (100 MHz, CDCl<sub>3</sub>): δ 196.0, 158.0, 147.0, 143.9, 134.7, 134.5, 133.1, 131.2, 130.4, 129.2, 128.2, 127.5, 127.1, 119.9, 104.0, 55.8, 21.3, 20.9;

ESI-HRMS *m/z*: Calcd for C<sub>23</sub>H<sub>22</sub>O<sub>3</sub>NaS [M+Na]<sup>+</sup> 401.1187, found 401.1188.



# Spectrums

3a

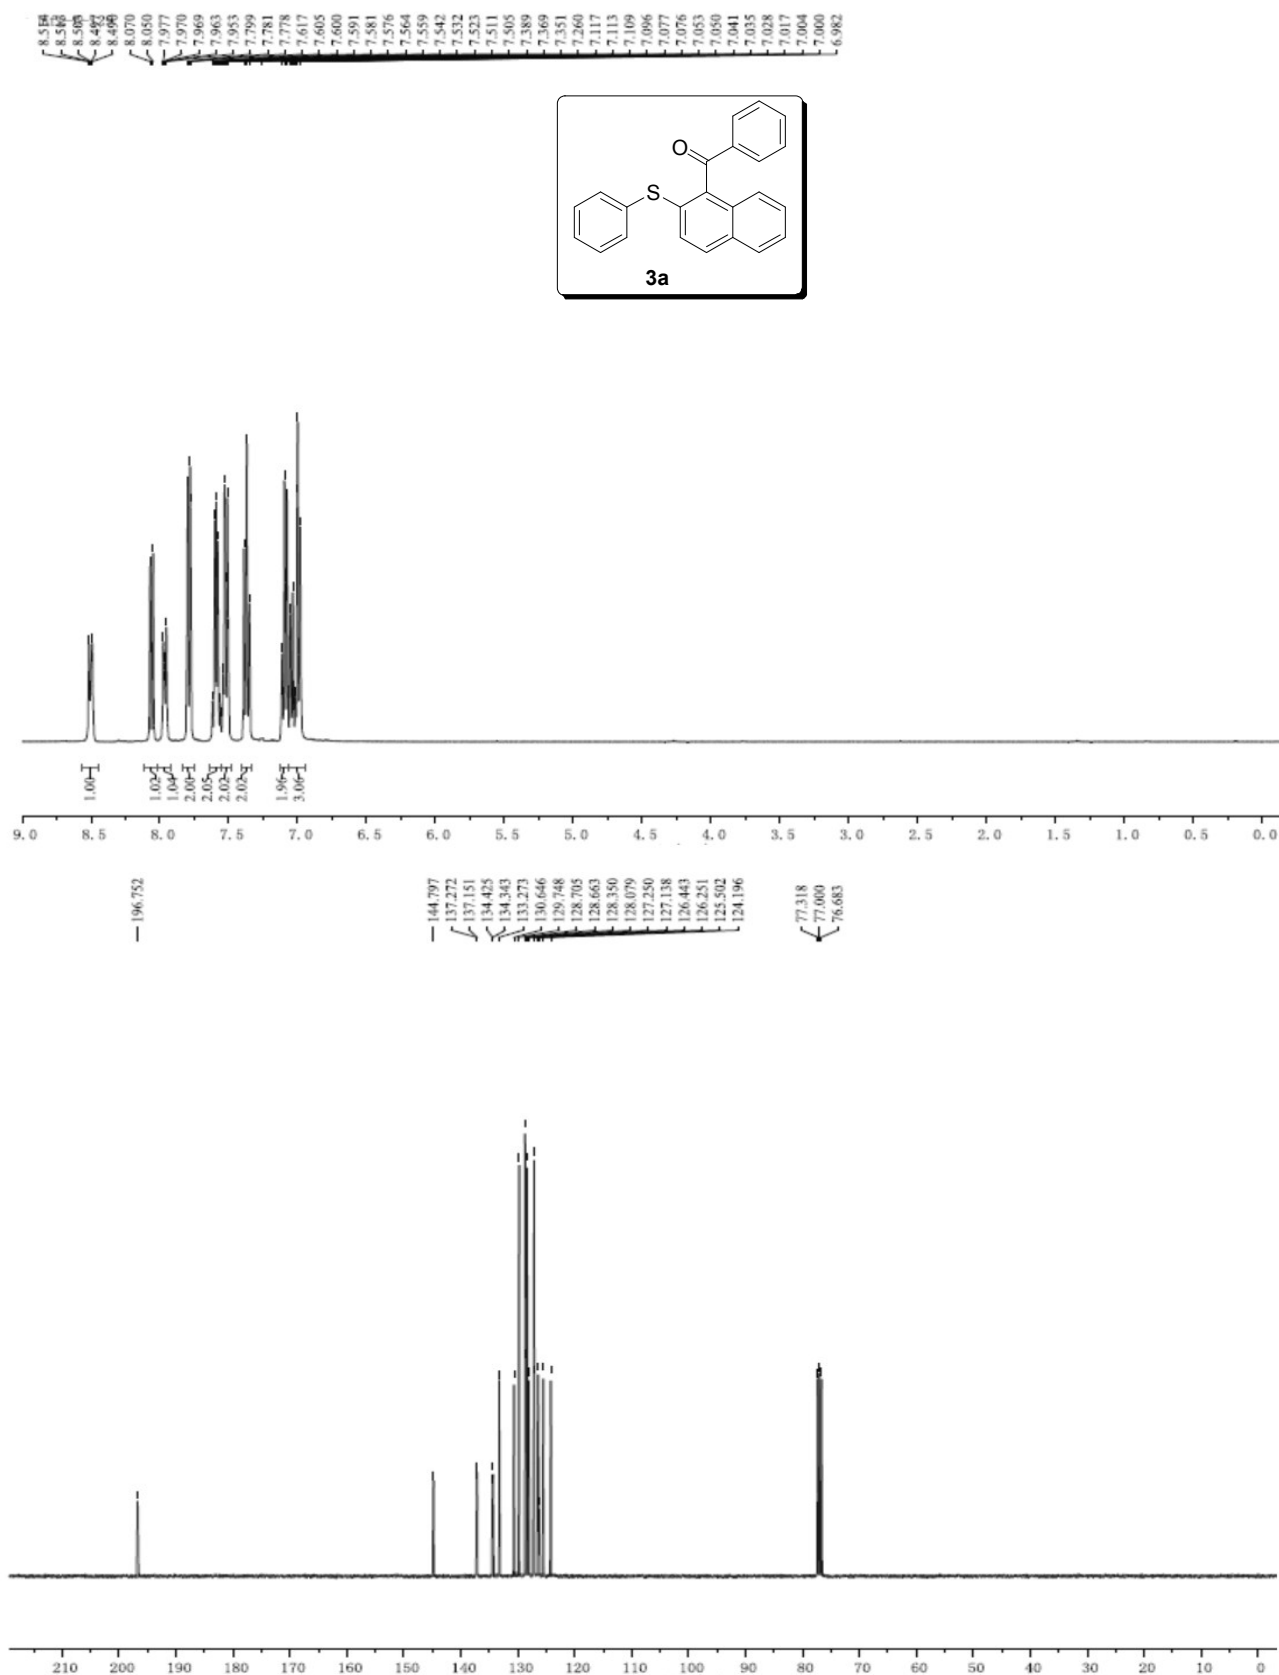

3b

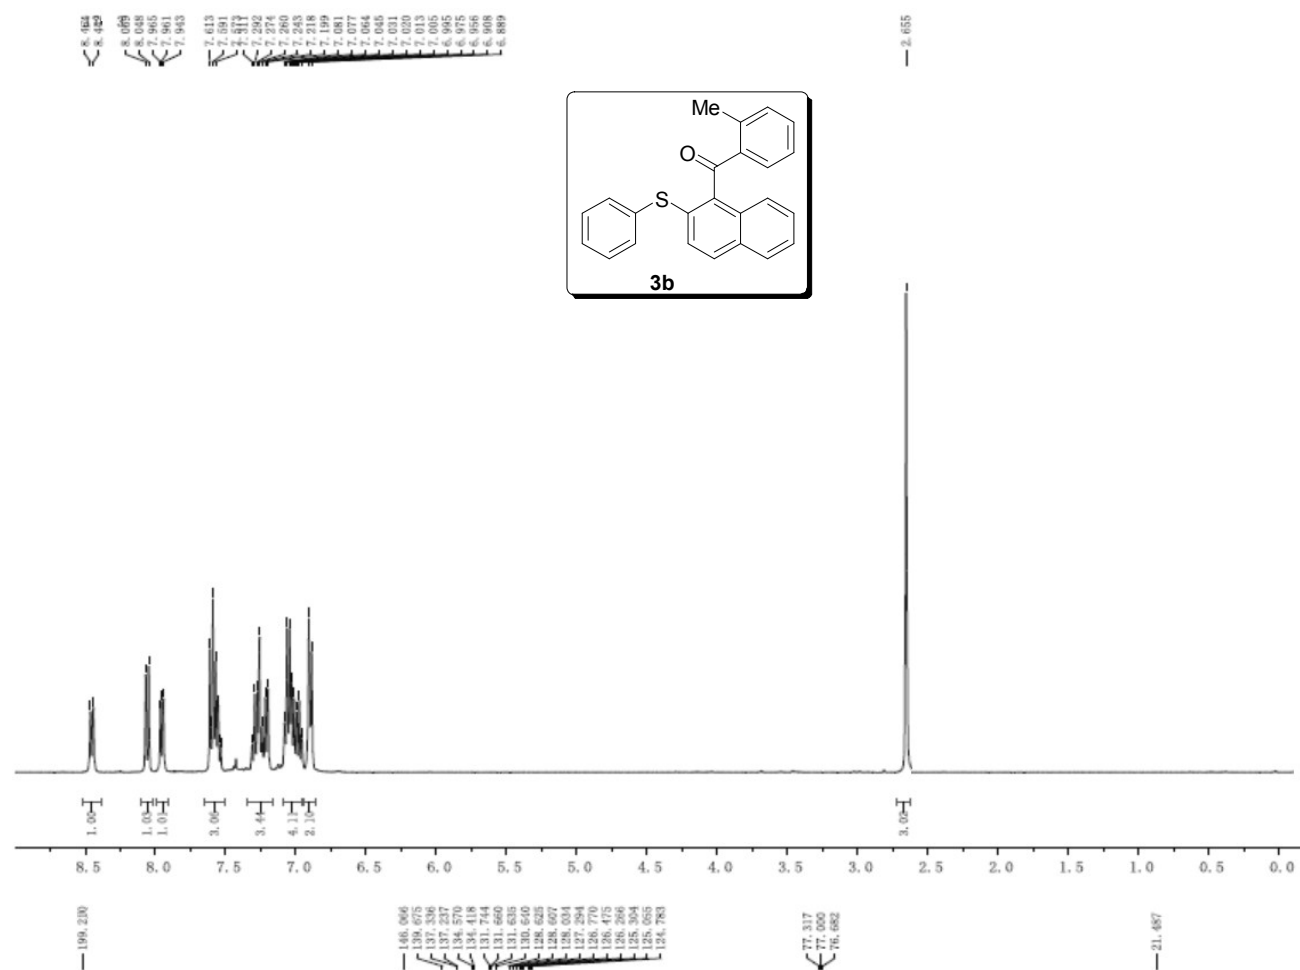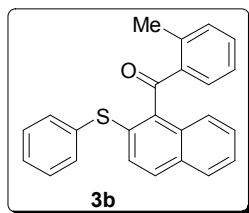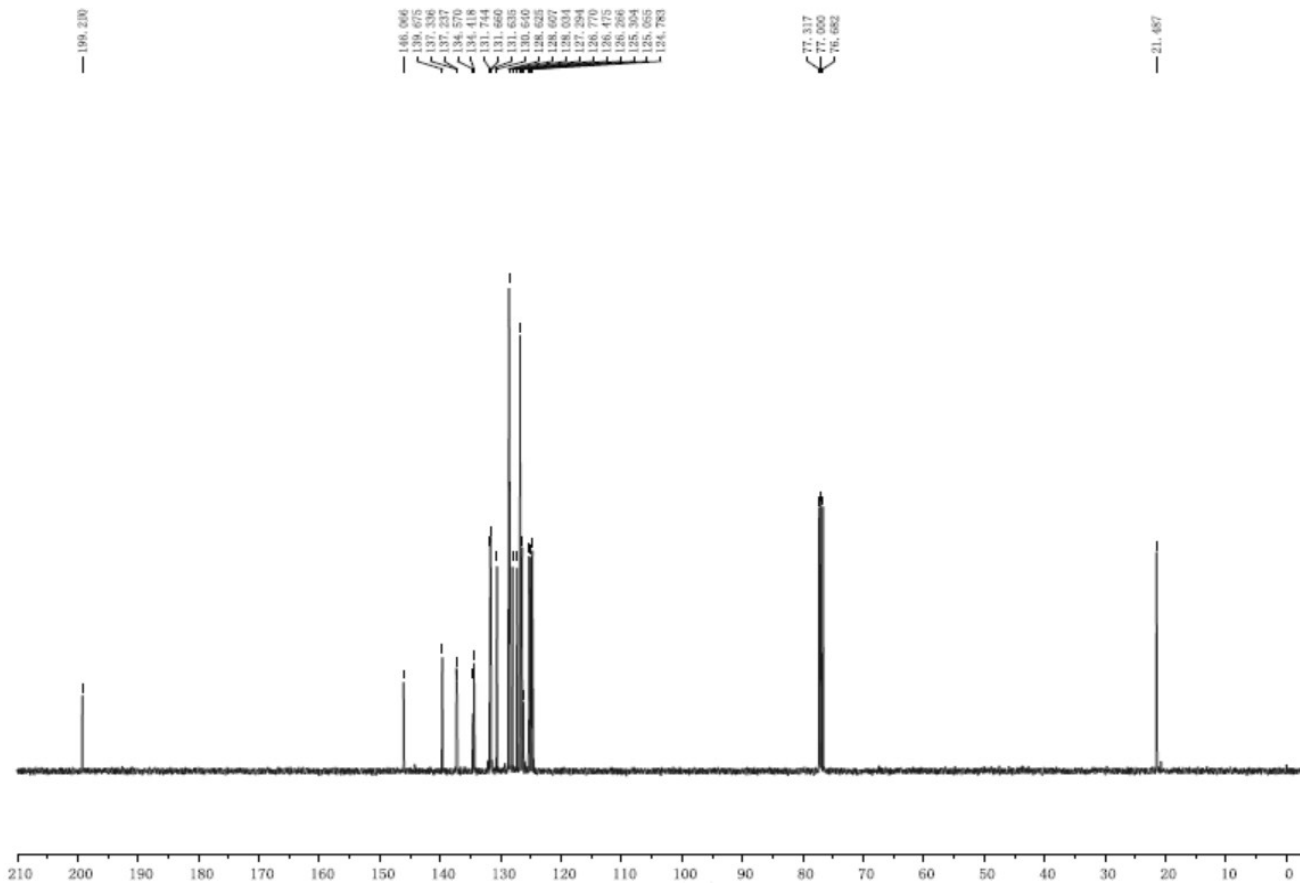

3c

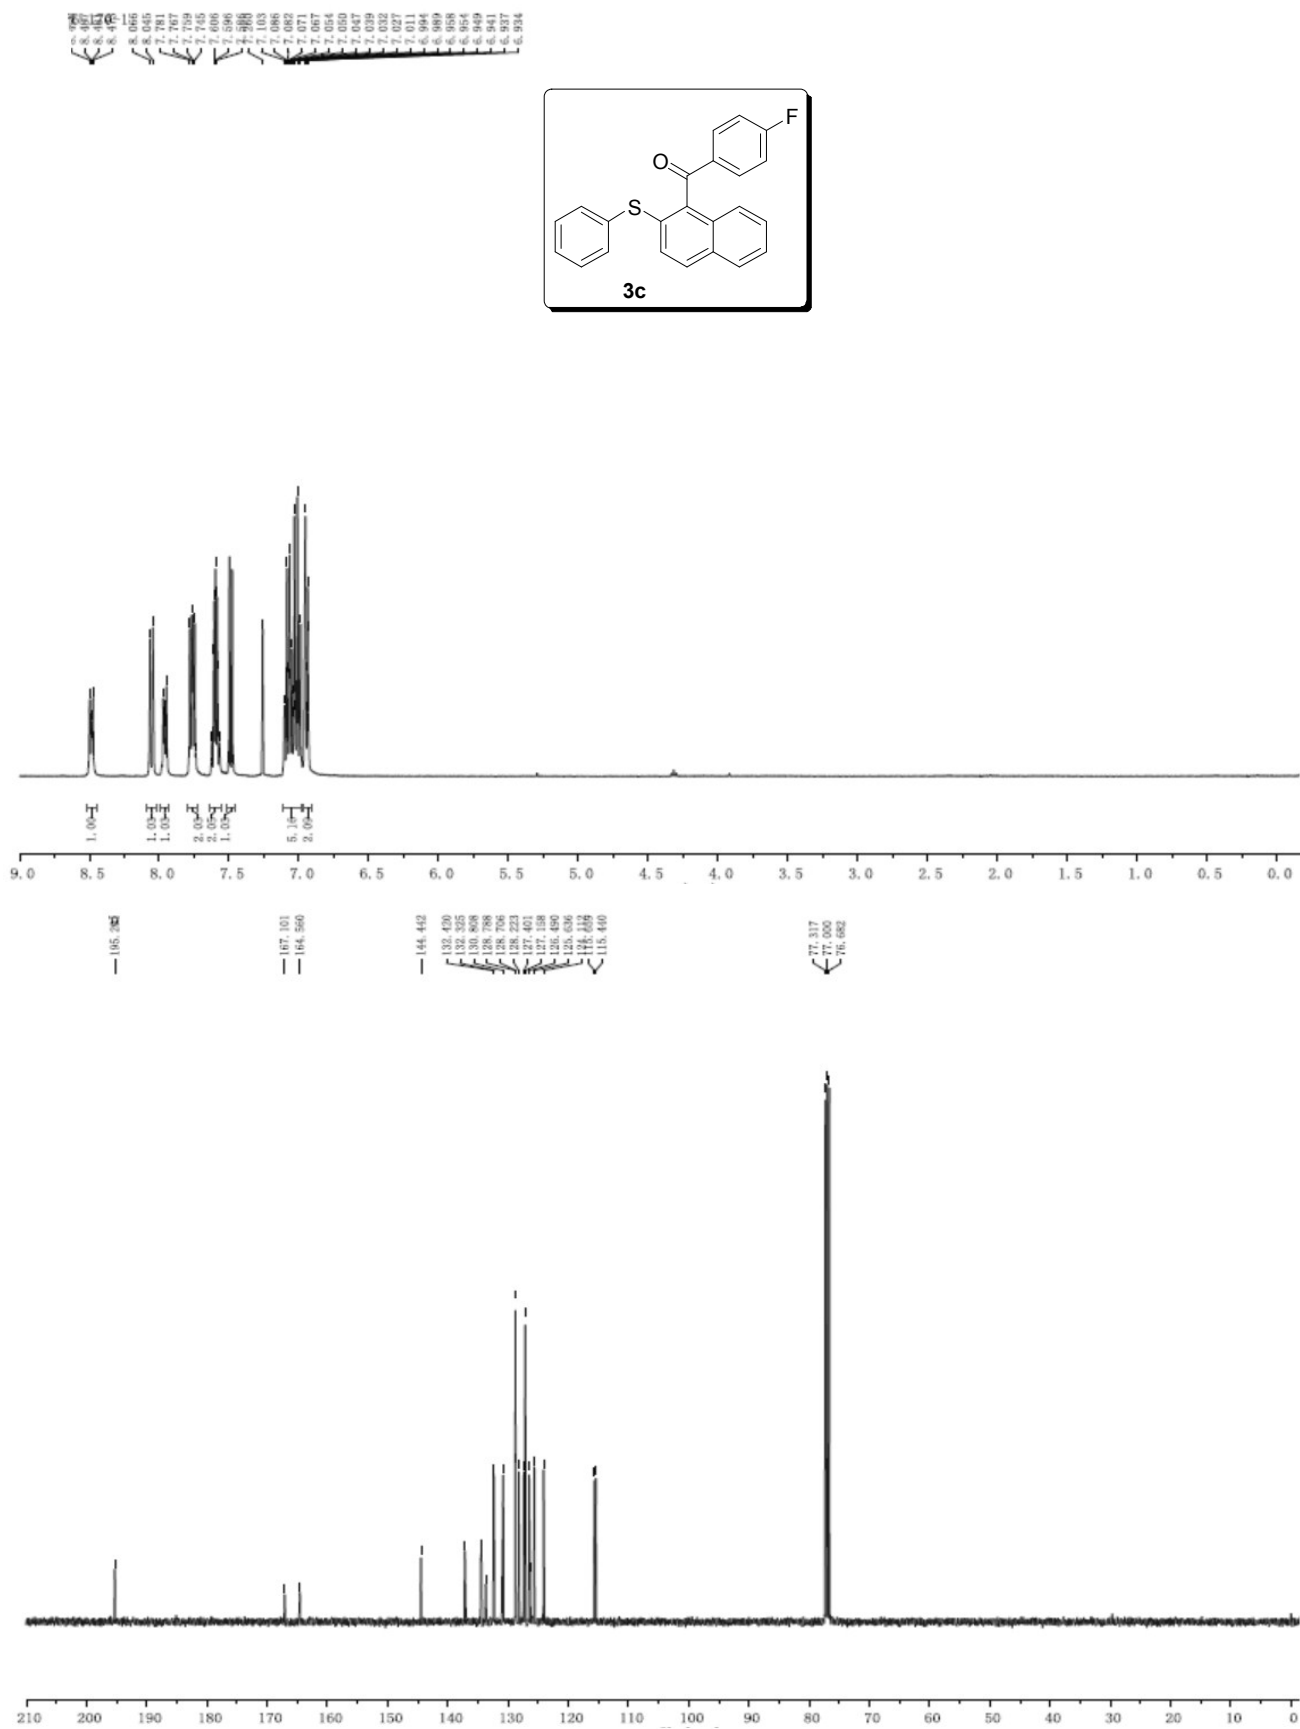





3f

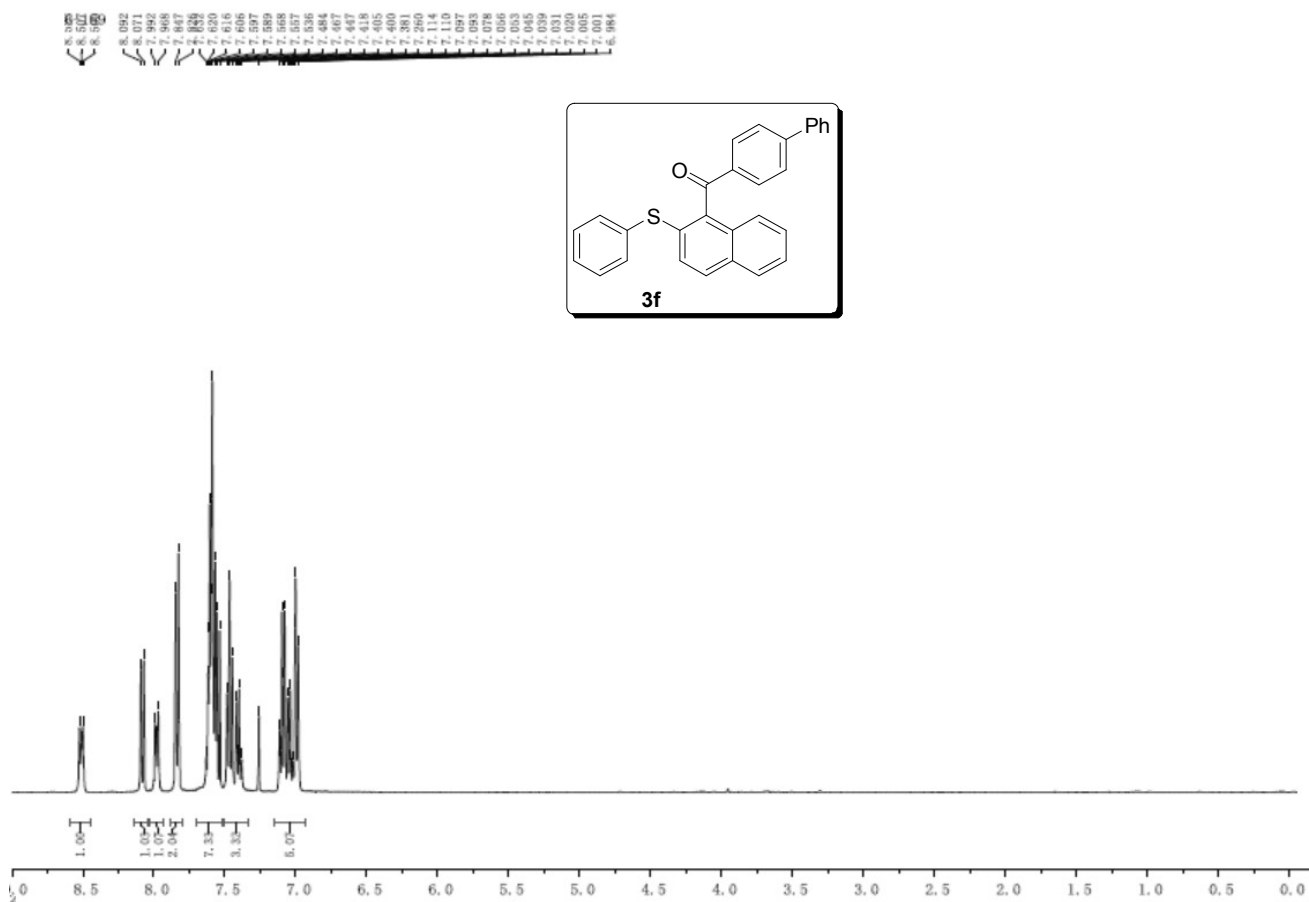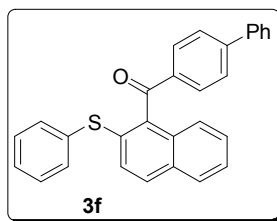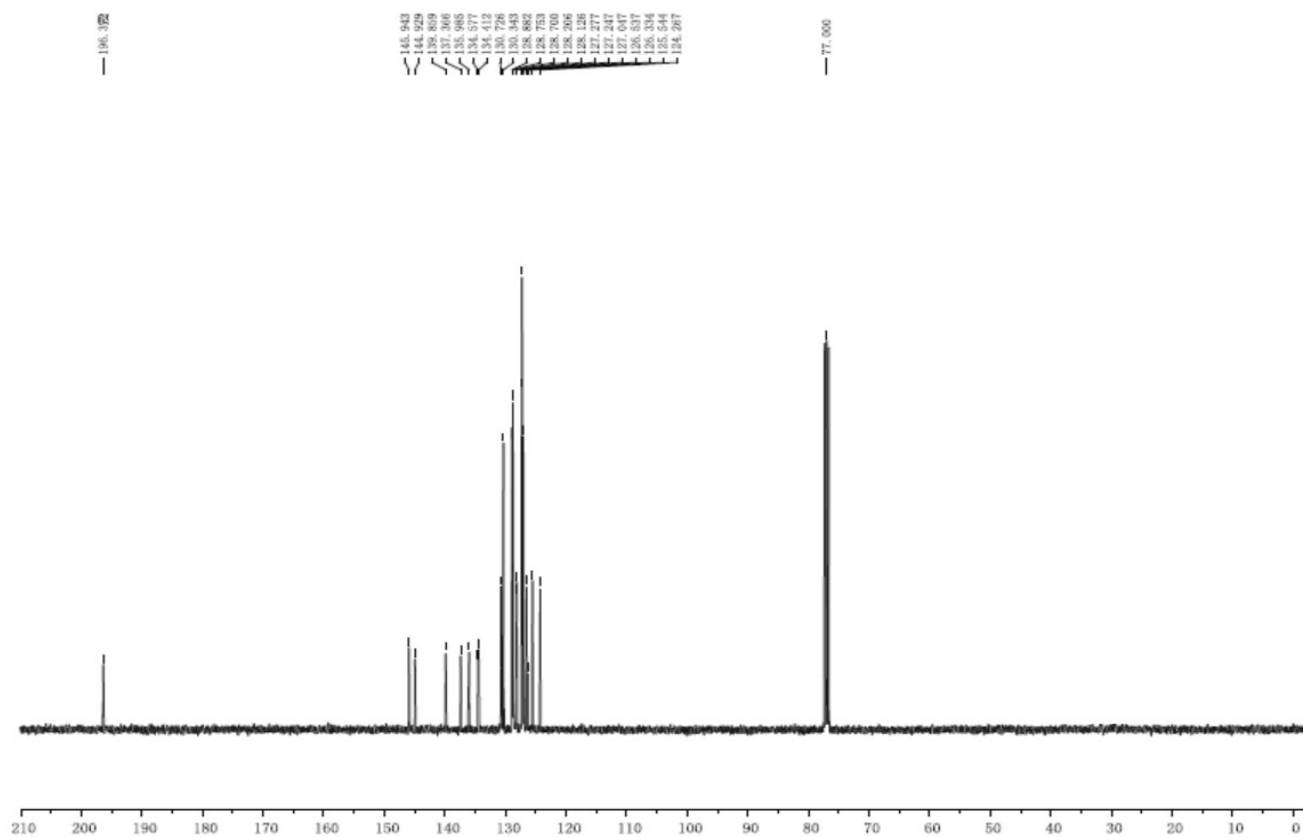

3g

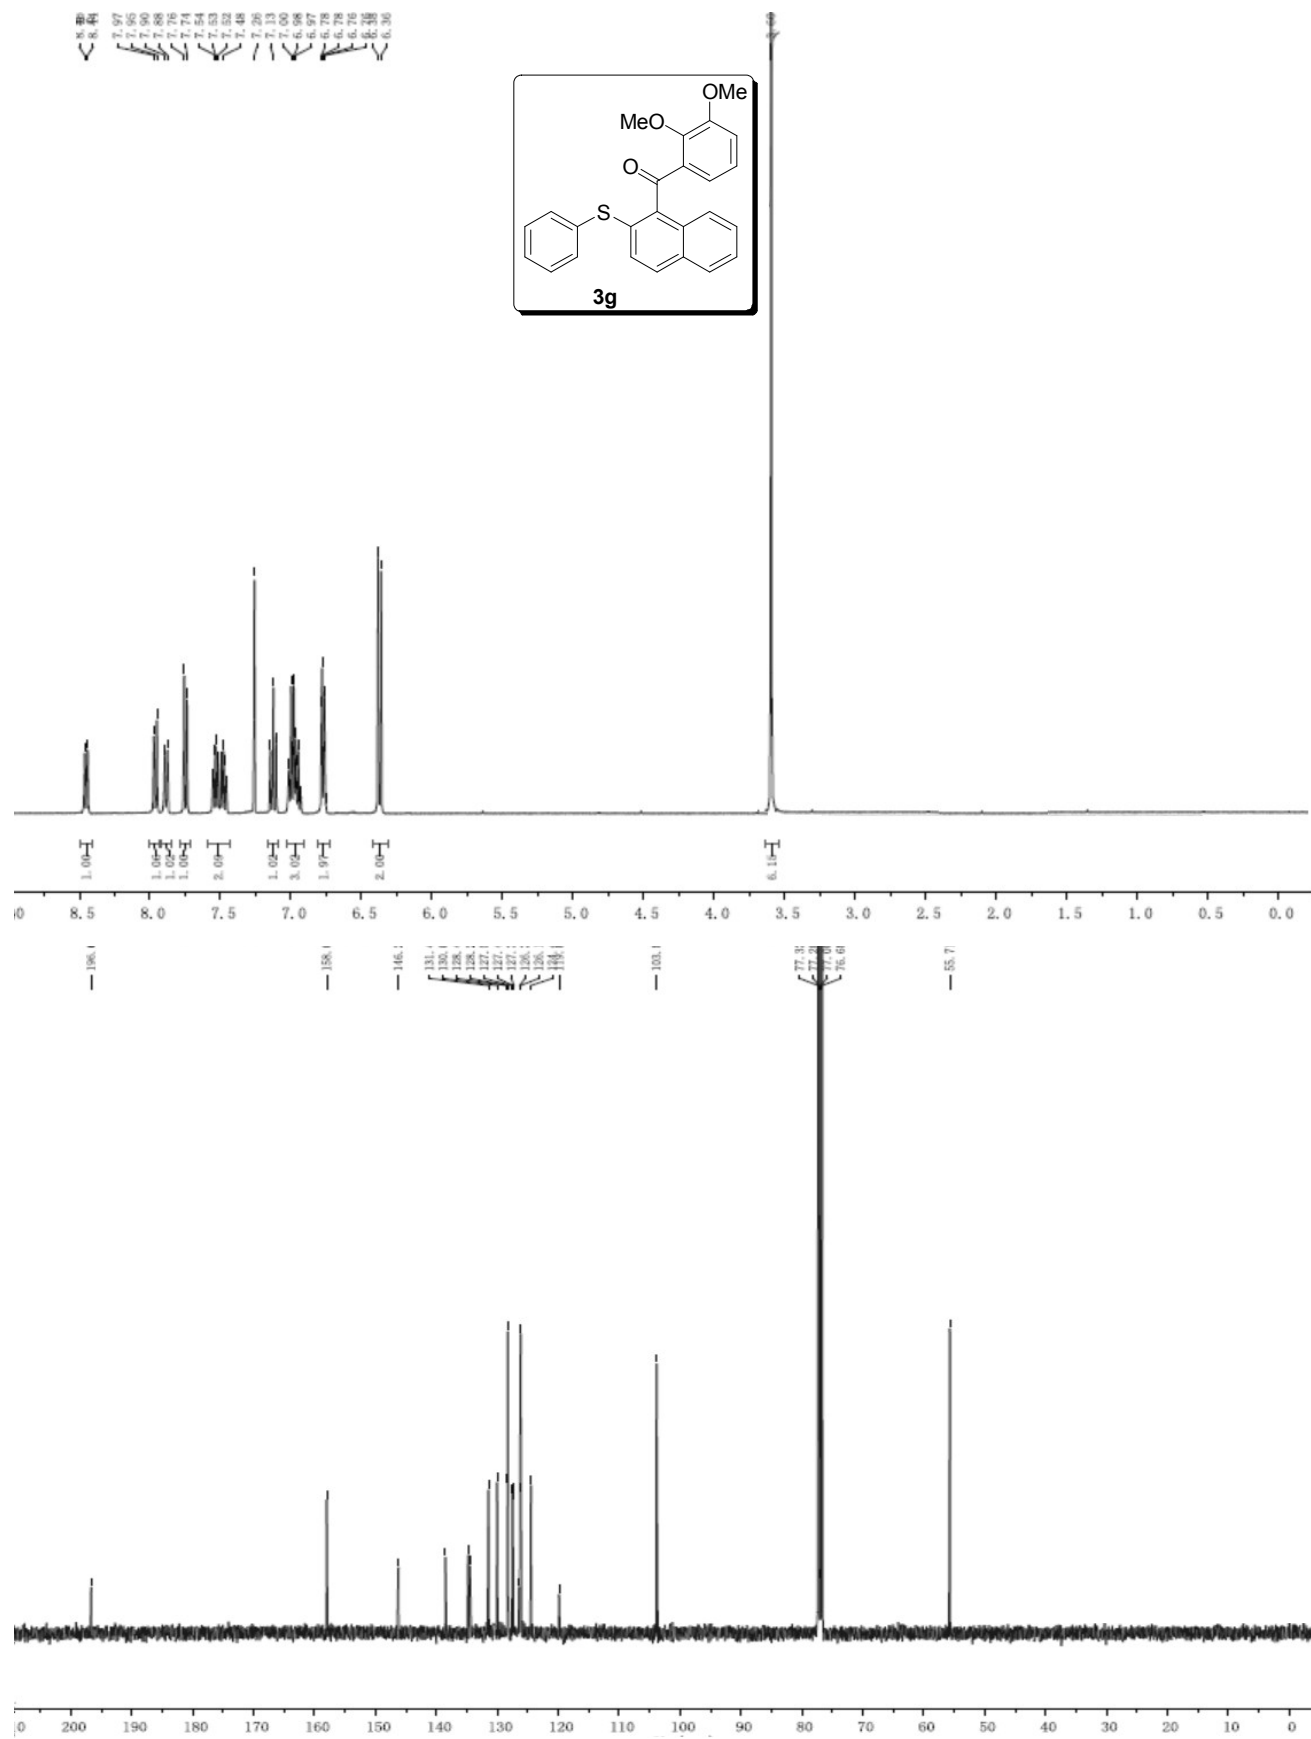

3h

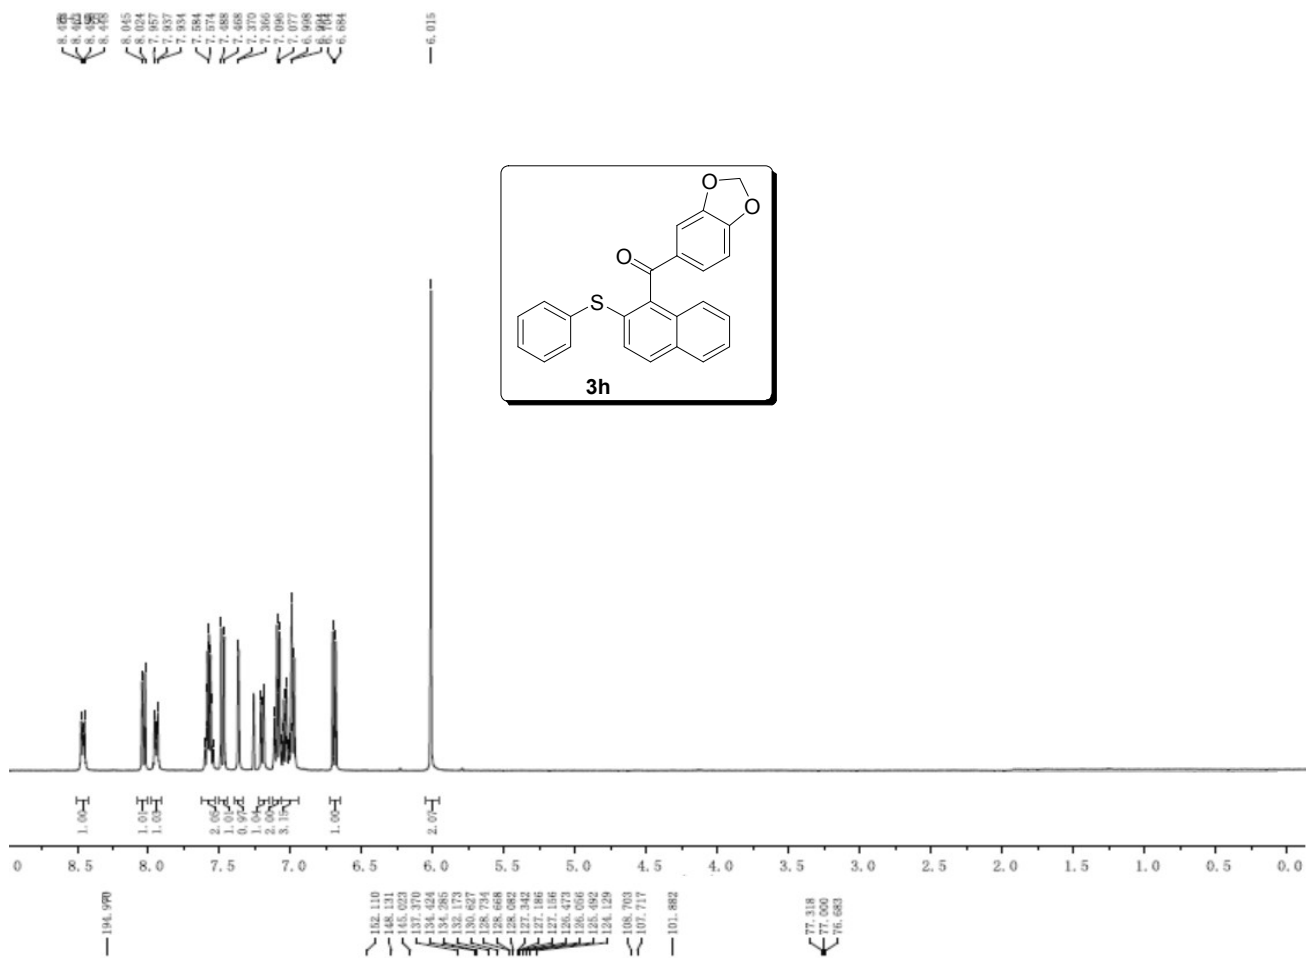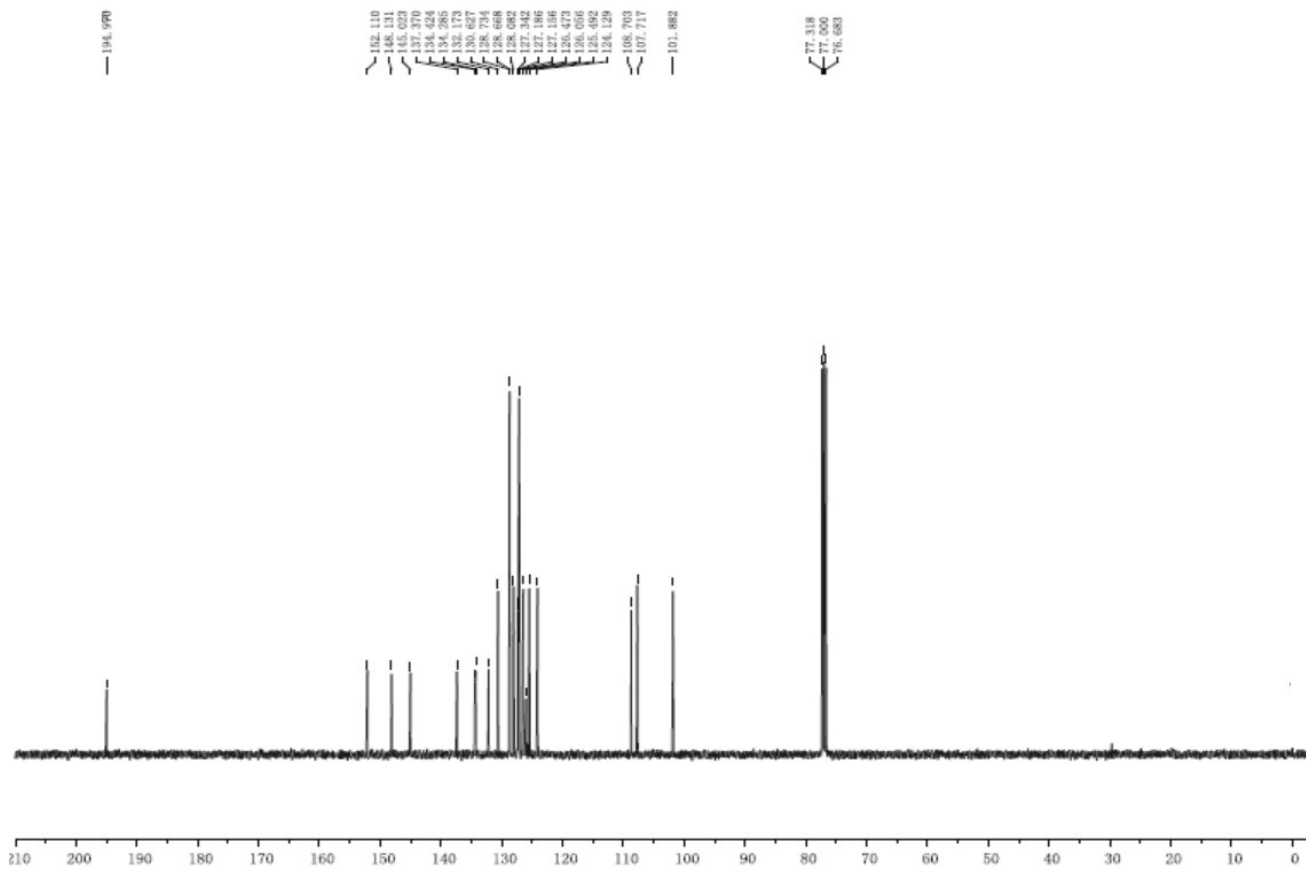



3i

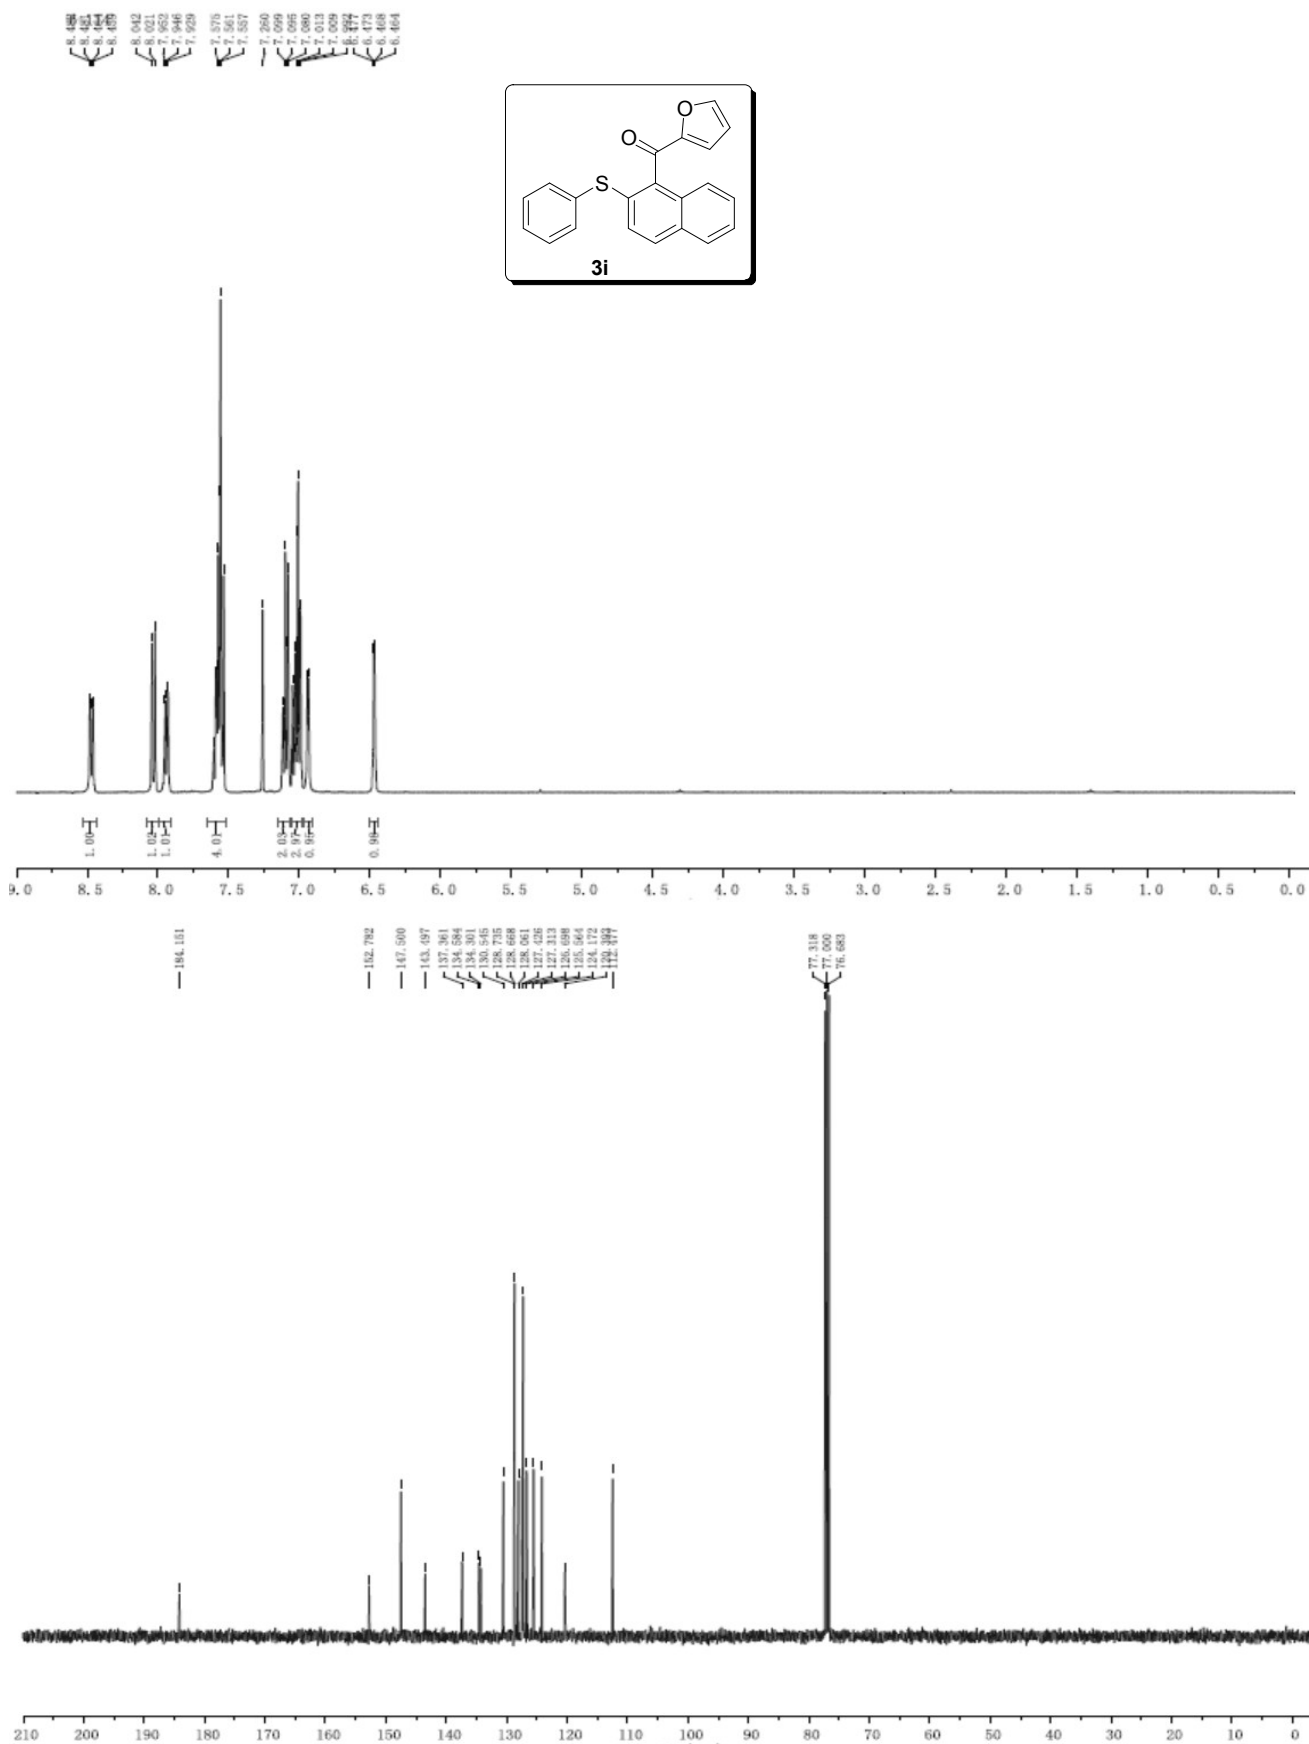

3j

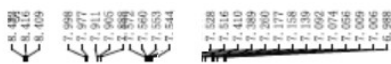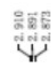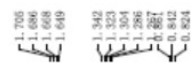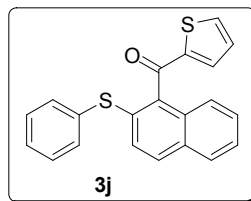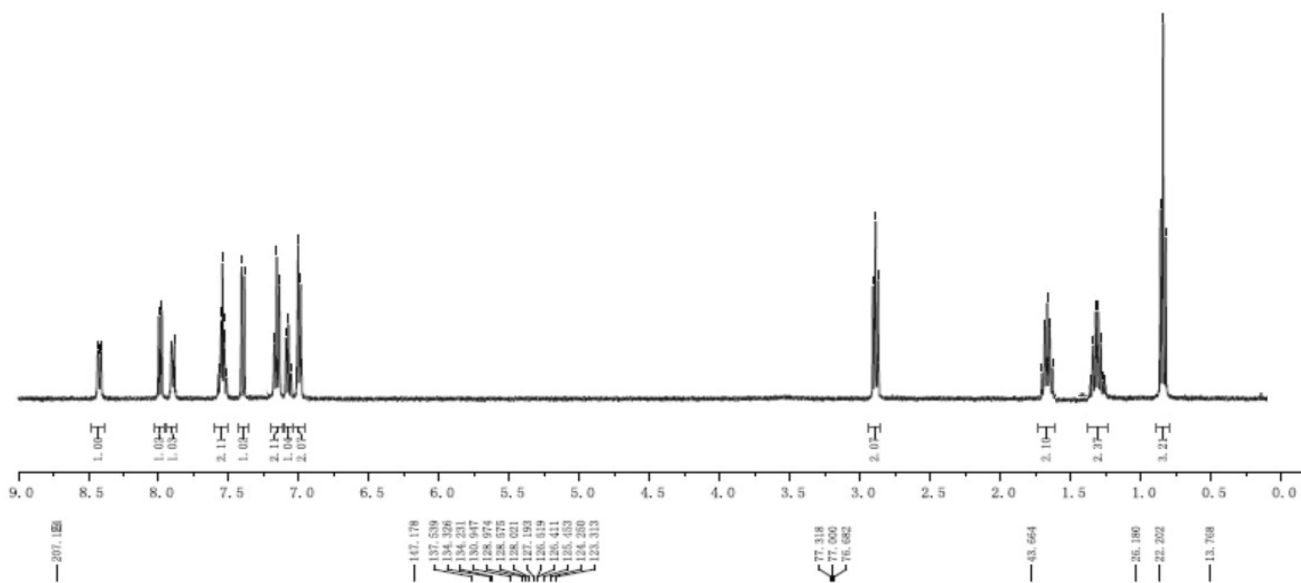

3k

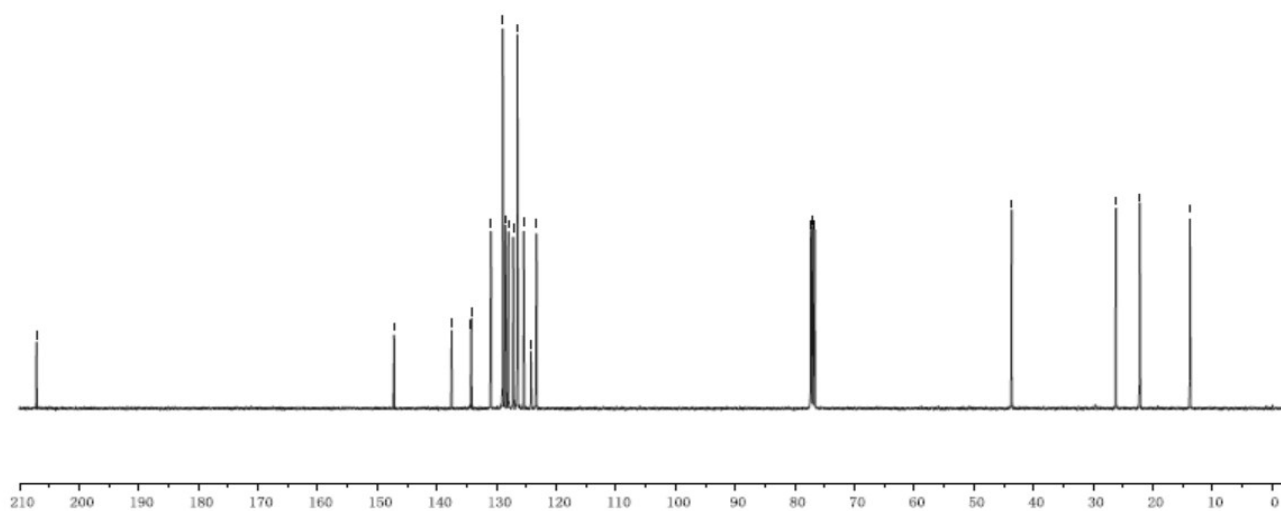

8.496  
 8.490  
 8.105  
 8.085  
 8.025  
 8.011  
 8.007  
 7.816  
 7.791  
 7.621  
 7.612  
 7.583  
 7.562  
 7.551  
 7.024  
 7.006  
 6.989  
 6.970  
 6.950  
 6.942  
 6.932  
 6.924

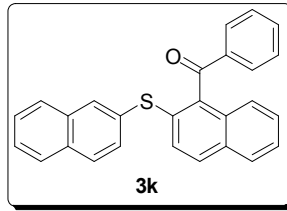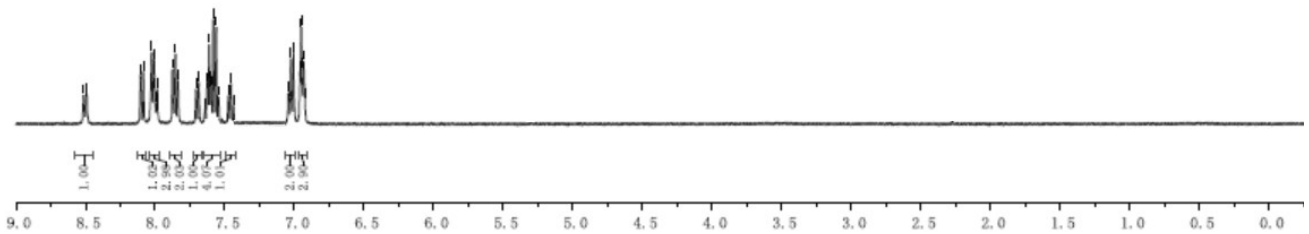

144.987  
 137.323  
 136.634  
 136.584  
 134.824  
 134.628  
 132.689  
 132.213  
 130.763  
 129.928  
 129.524  
 128.670  
 128.608  
 128.451  
 128.153  
 127.712  
 127.311  
 127.084  
 126.572  
 126.348  
 126.023  
 125.425  
 124.602  
 124.391  
 77.317  
 77.000  
 76.682

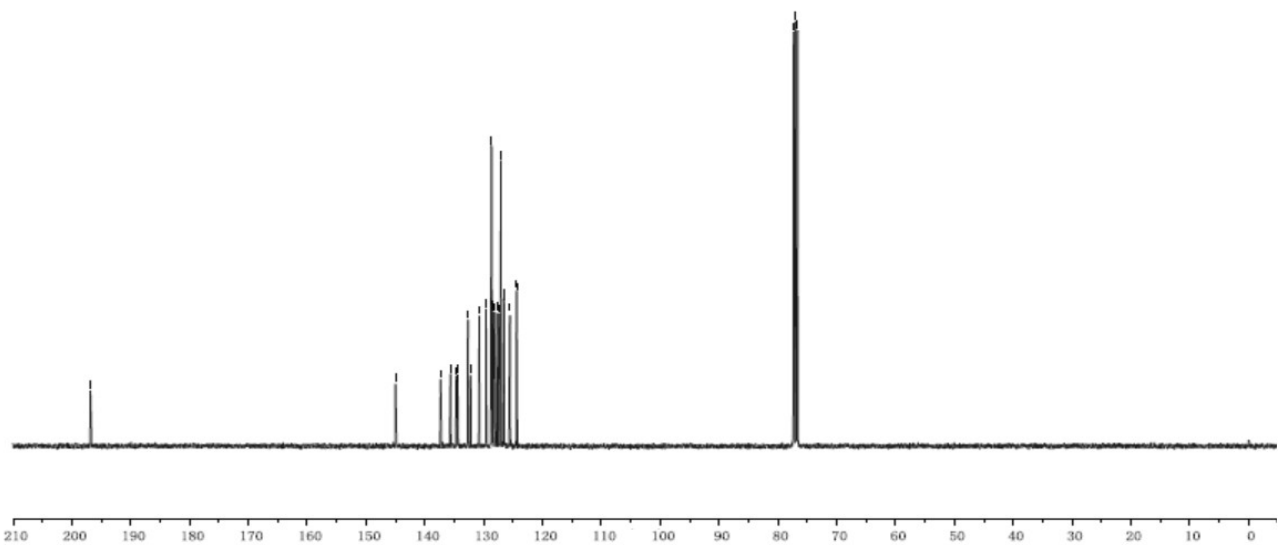

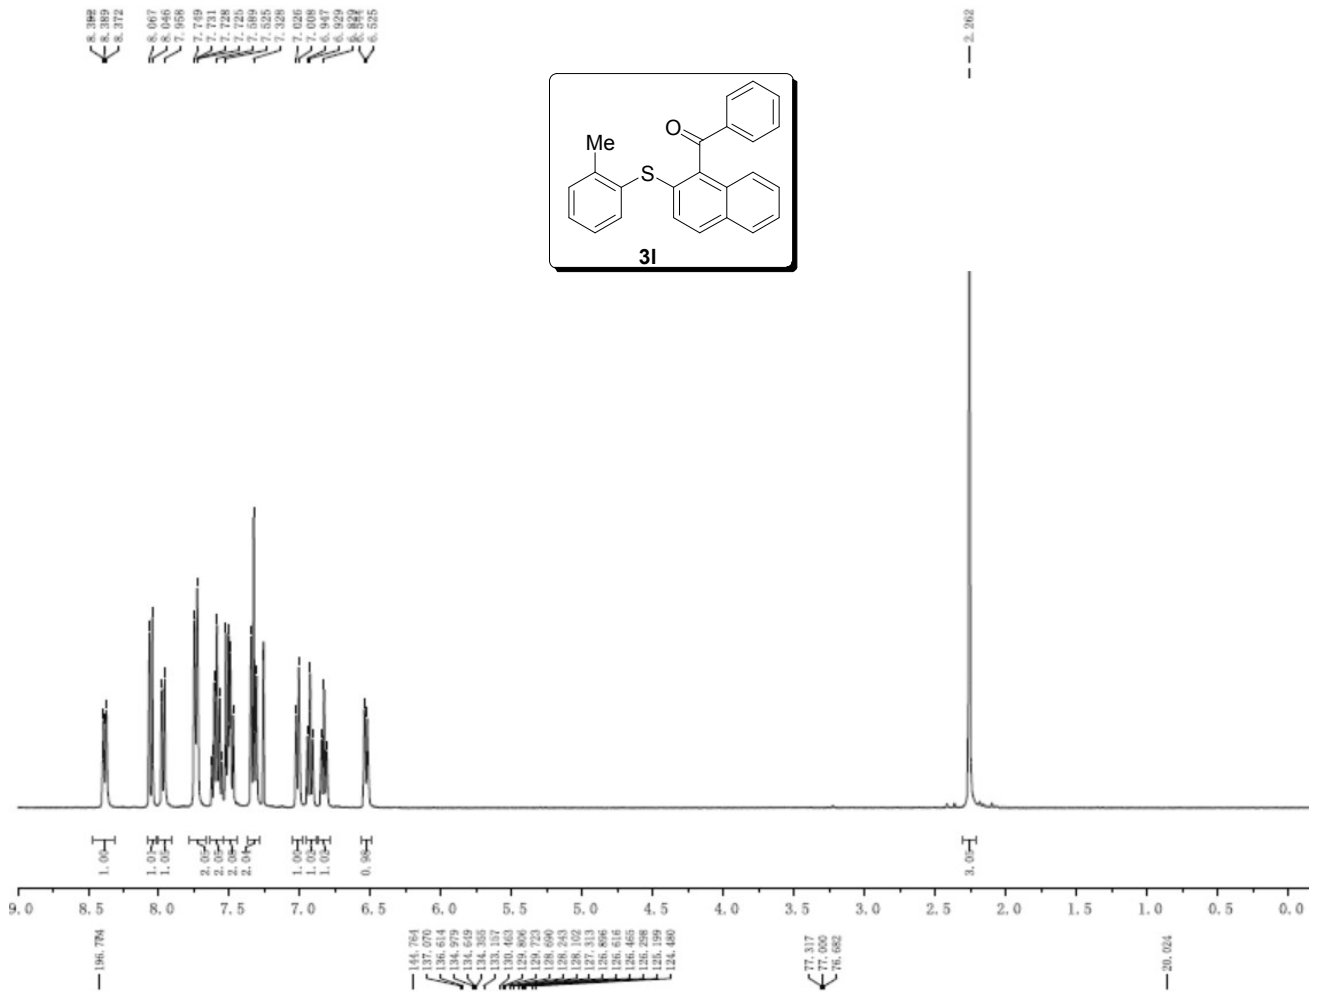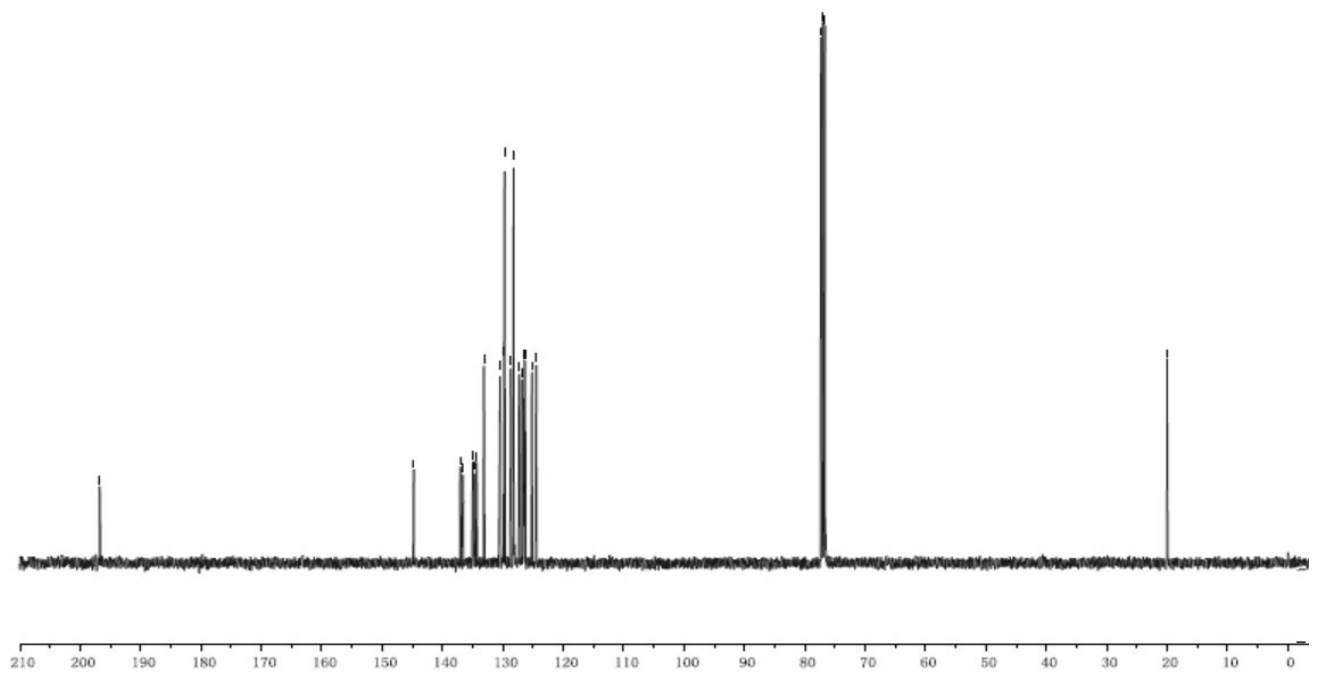

3m

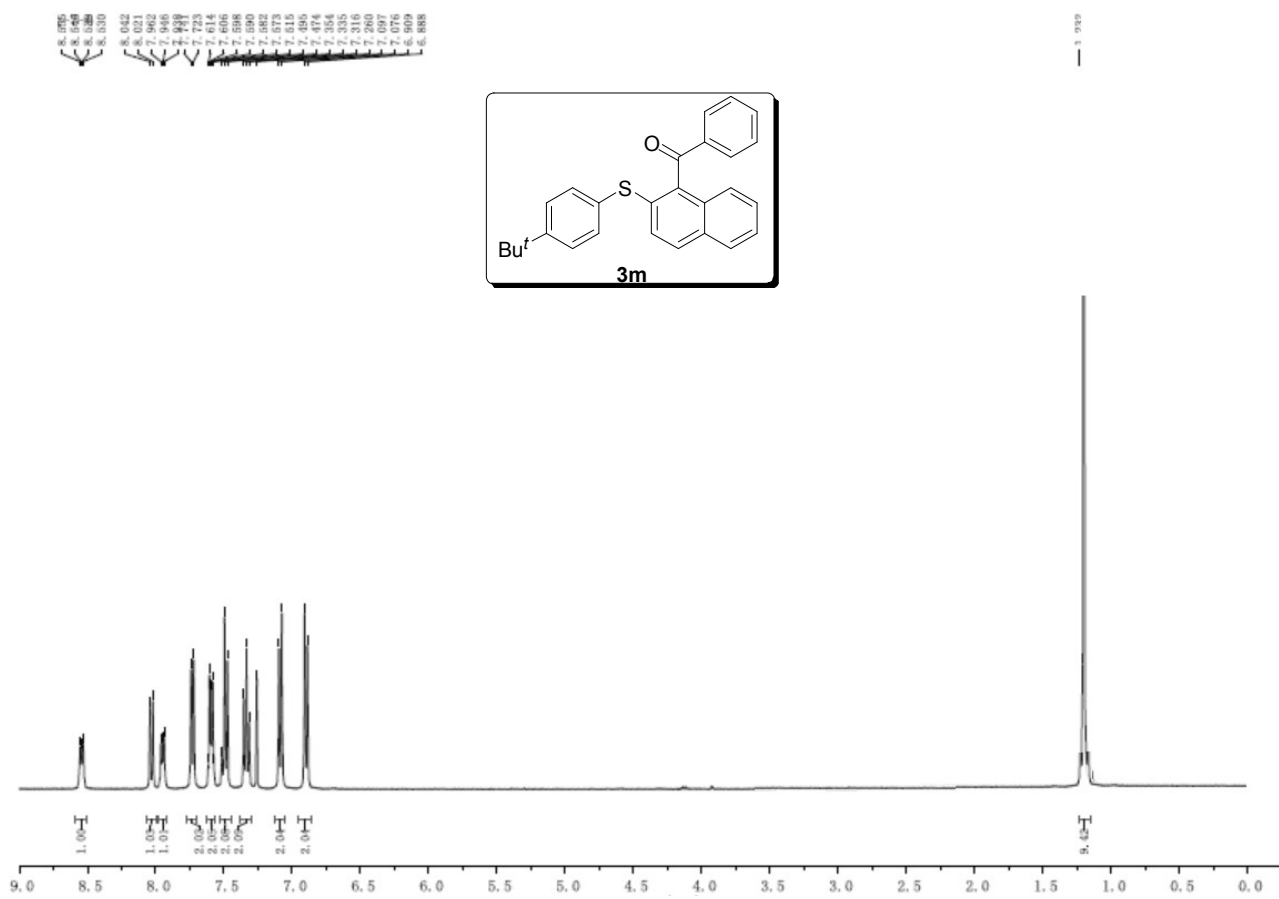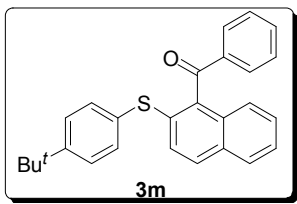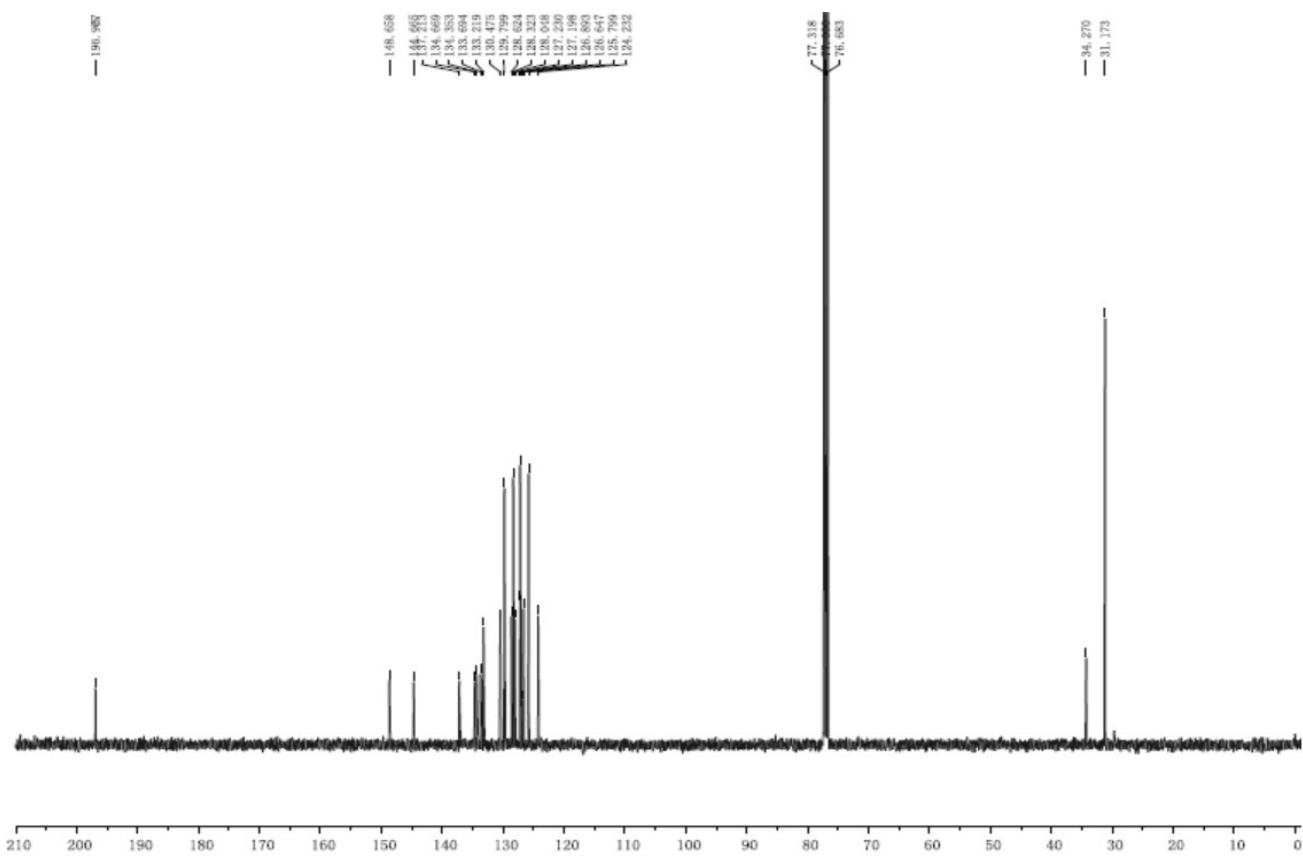

3n

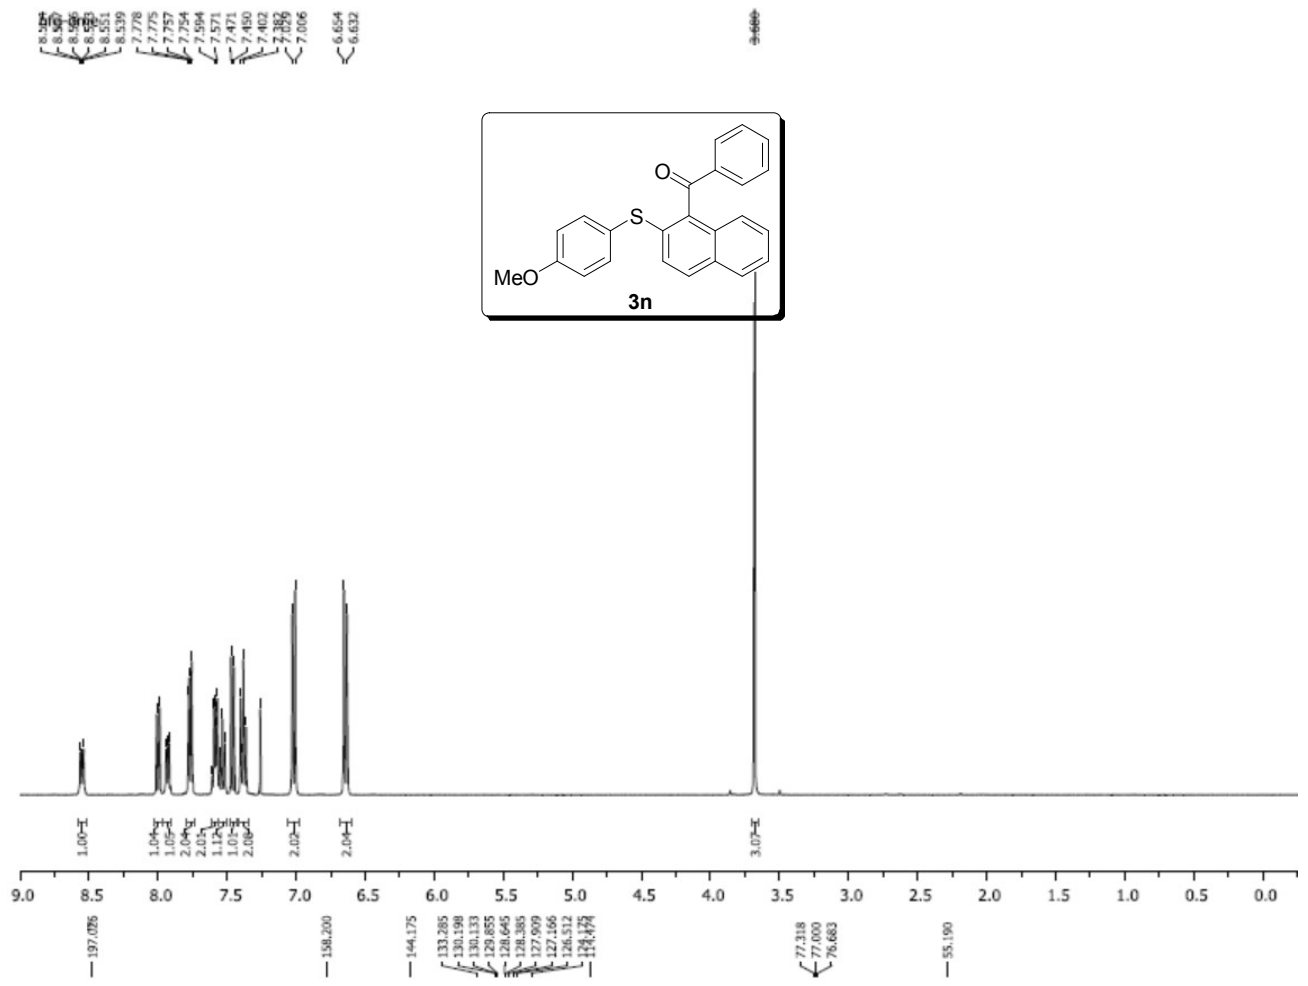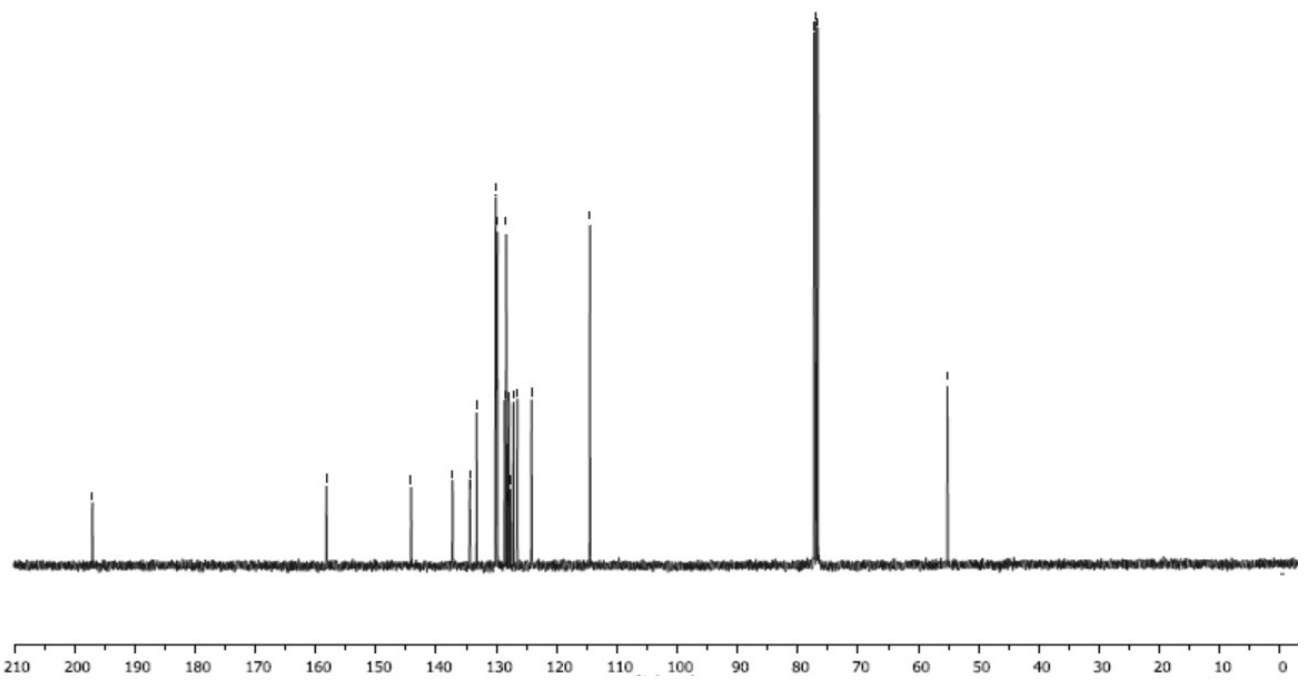

30

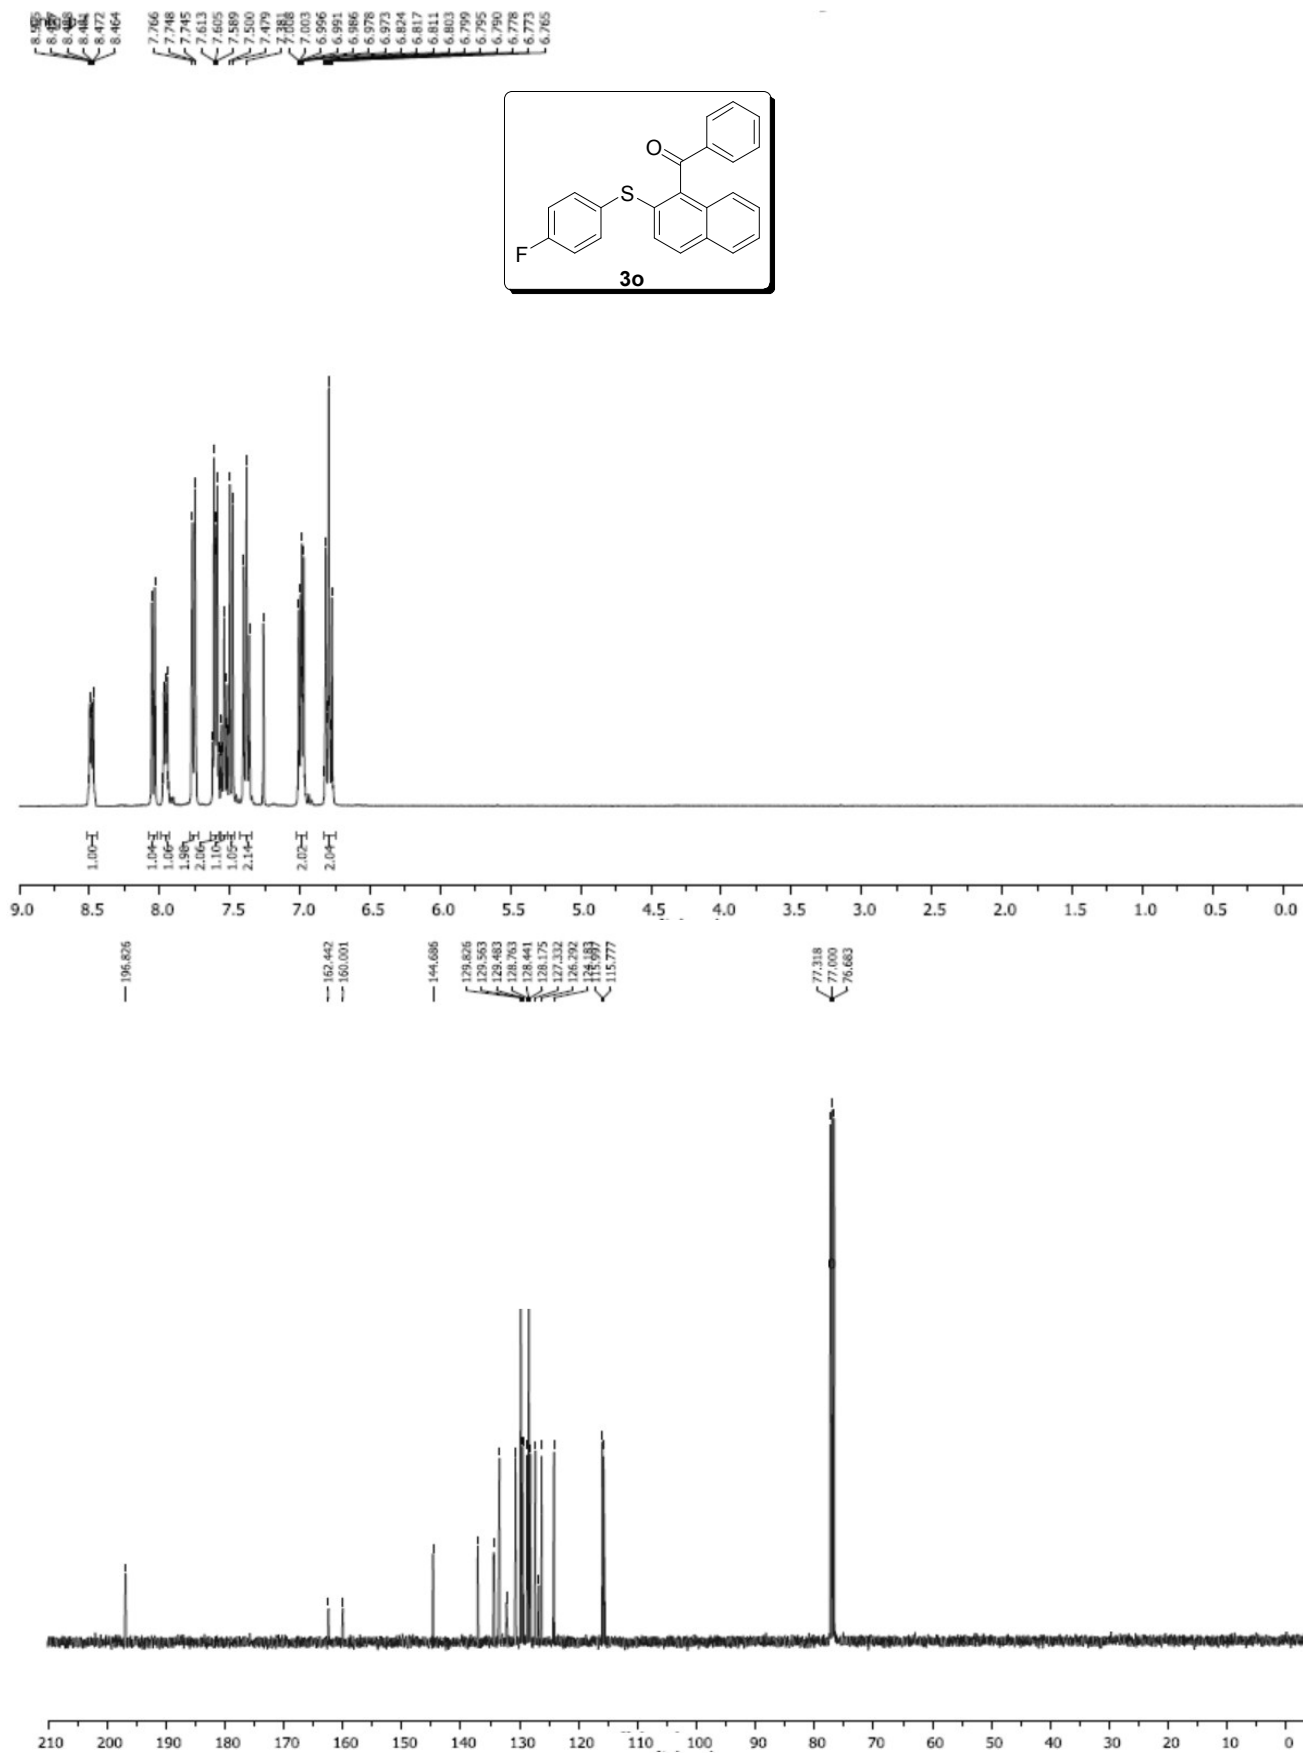

3p

8.367  
8.346  
8.078  
8.057  
7.755  
7.735  
7.566  
7.519  
7.498  
7.487  
7.351  
7.331  
6.929  
6.926  
6.853  
6.852  
6.851  
6.482

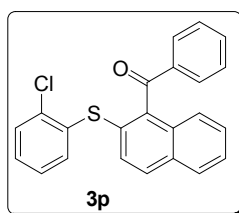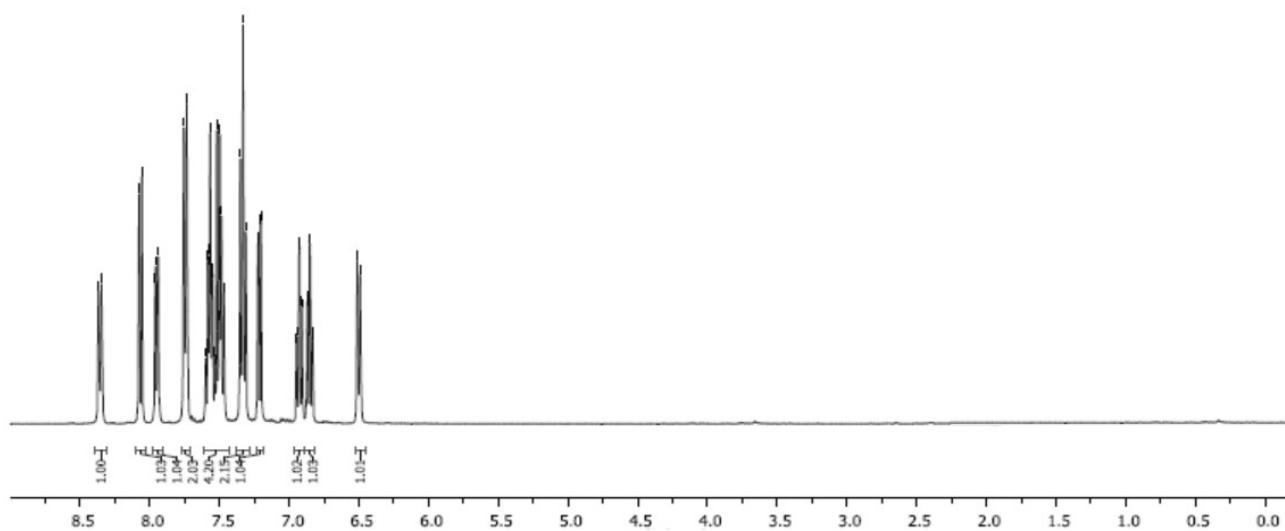

196.519

145.378  
136.897  
136.565  
134.313  
133.373  
131.089  
130.798  
129.748  
128.748  
128.377  
128.356  
127.763  
127.641  
126.925  
126.134  
126.104  
124.989  
124.252

77.318  
77.000  
76.682

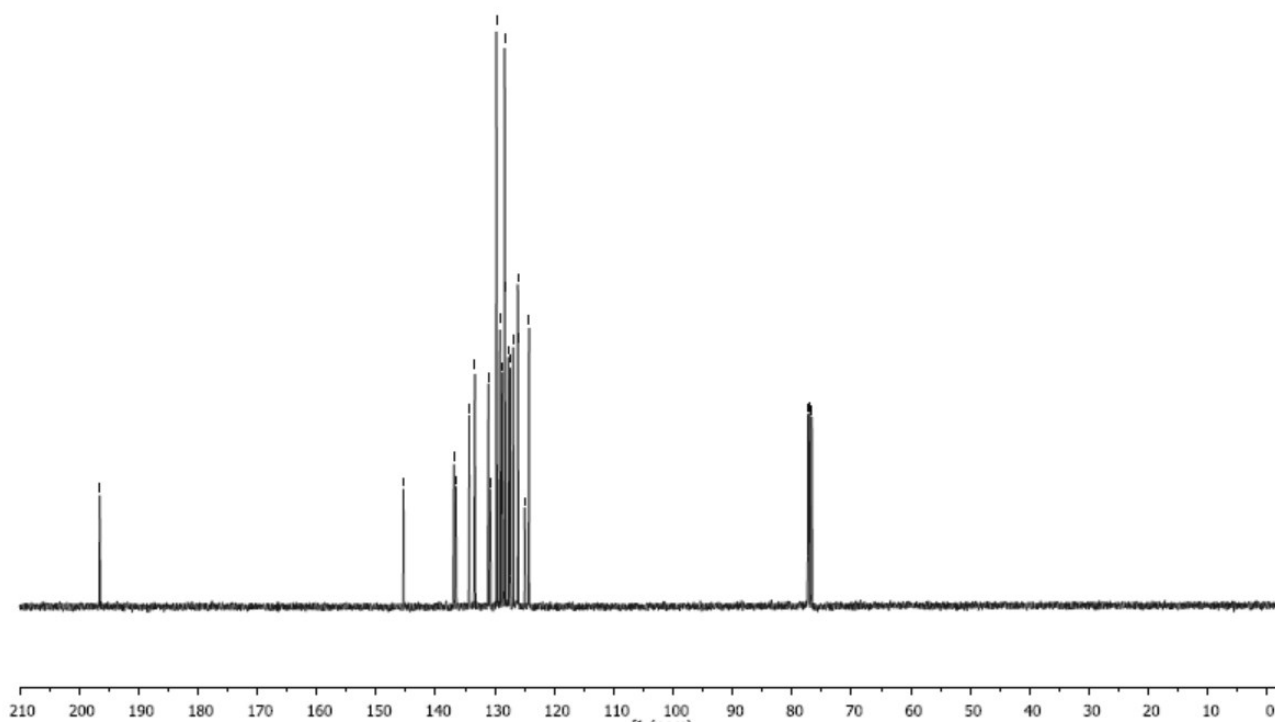

3q



8.0927  
8.0866  
7.9800  
7.9720  
7.9680  
7.9640  
7.9580  
7.9520  
7.7770  
7.7532  
7.6239  
7.6174  
7.6114  
7.6112  
7.6044  
7.5965  
7.5903  
7.5841  
7.5778  
7.5650  
7.5537  
7.5442  
7.5373  
7.5313  
7.4937  
7.4900  
7.3811  
7.3611  
7.3550  
7.3510  
7.0542  
7.0537  
7.0446  
7.0400  
7.0314  
6.9132  
6.9077  
6.8995  
6.8941  
6.8894

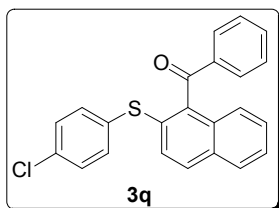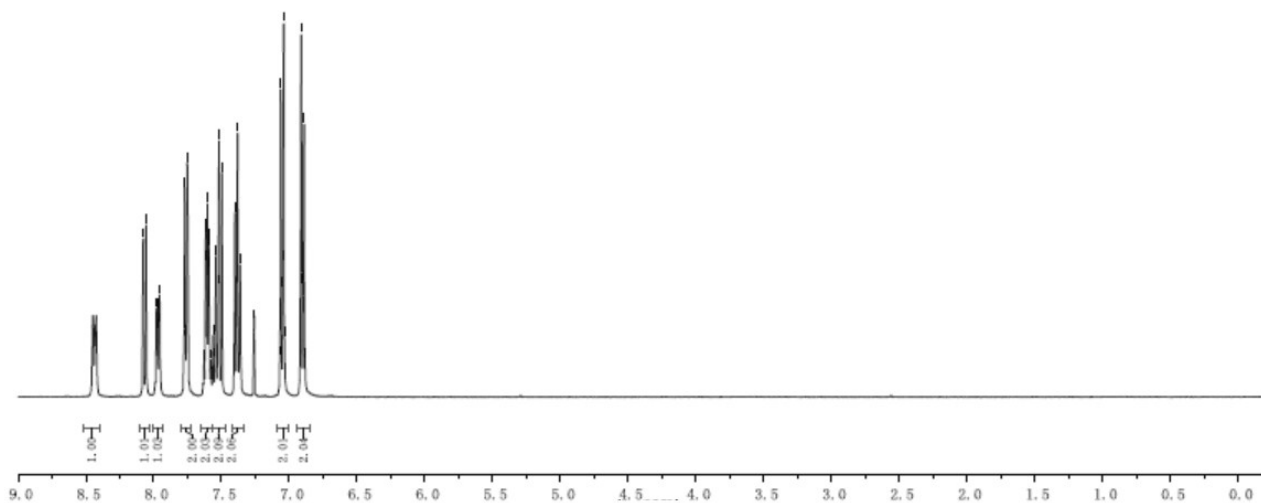

— 130k, 6002

144.922  
137.018  
135.814  
134.385  
134.255  
133.463  
131.850  
131.594  
129.755  
128.856  
128.788  
128.453  
128.289  
127.754  
126.197  
125.766  
124.182

77.317  
77.000  
76.682

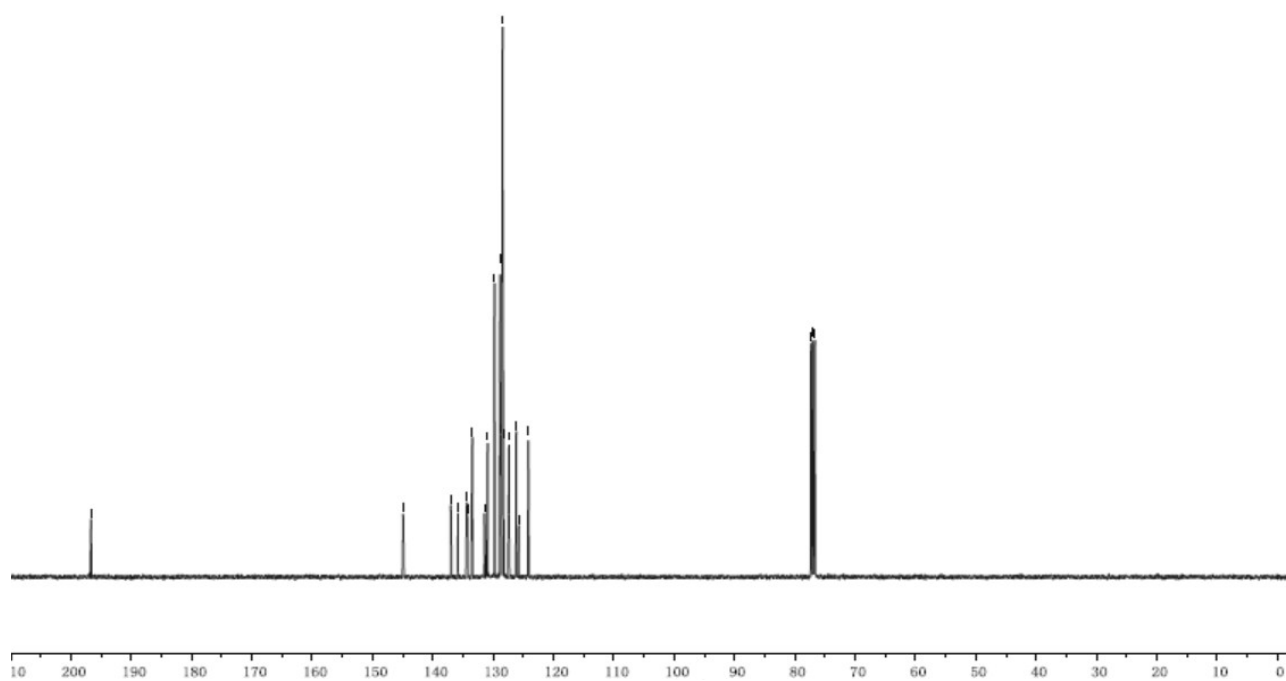

**3r**

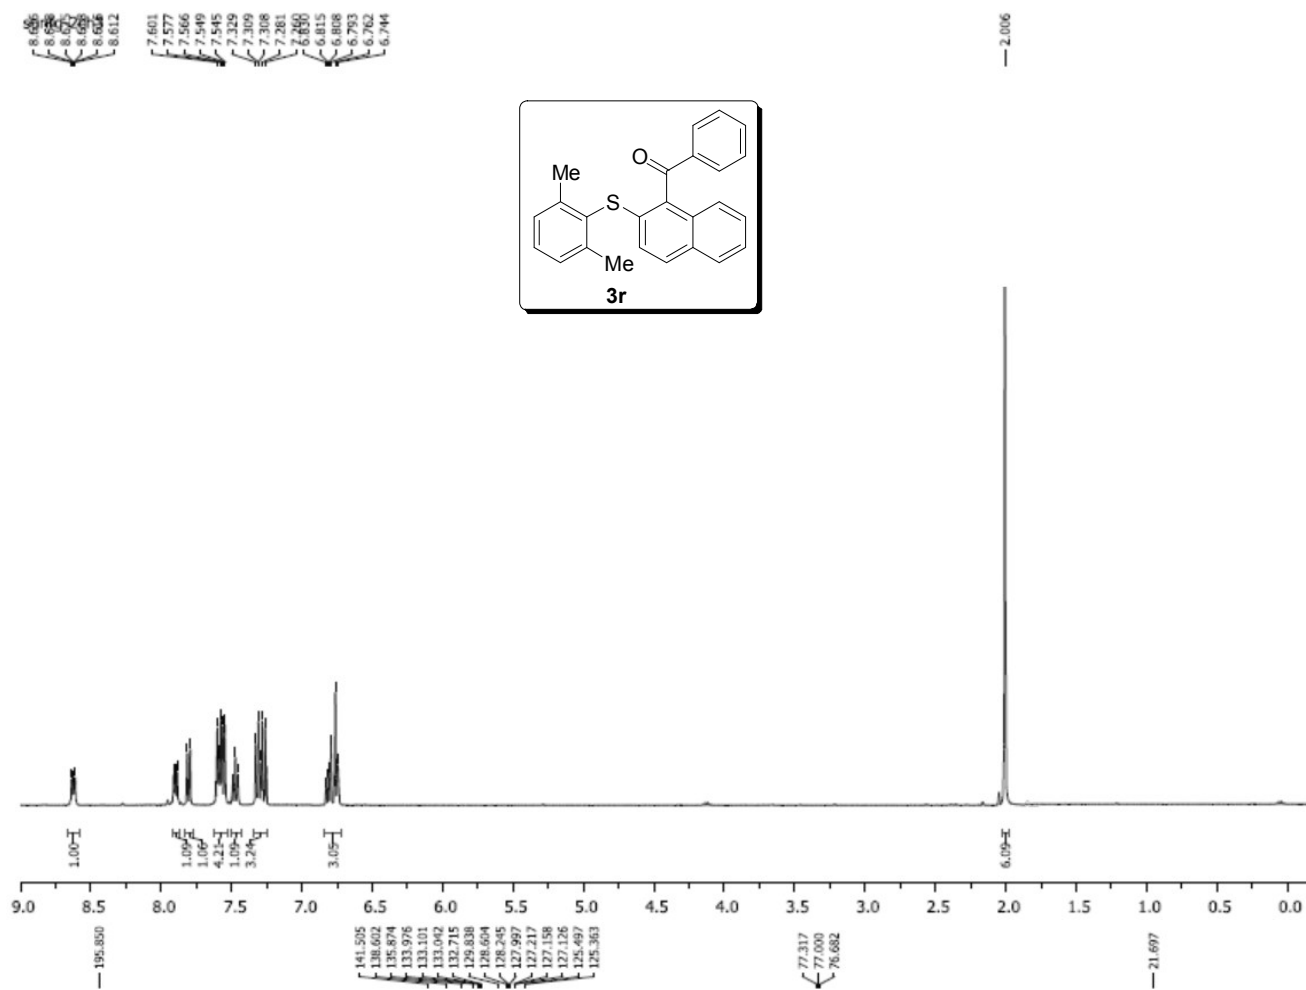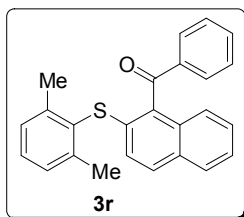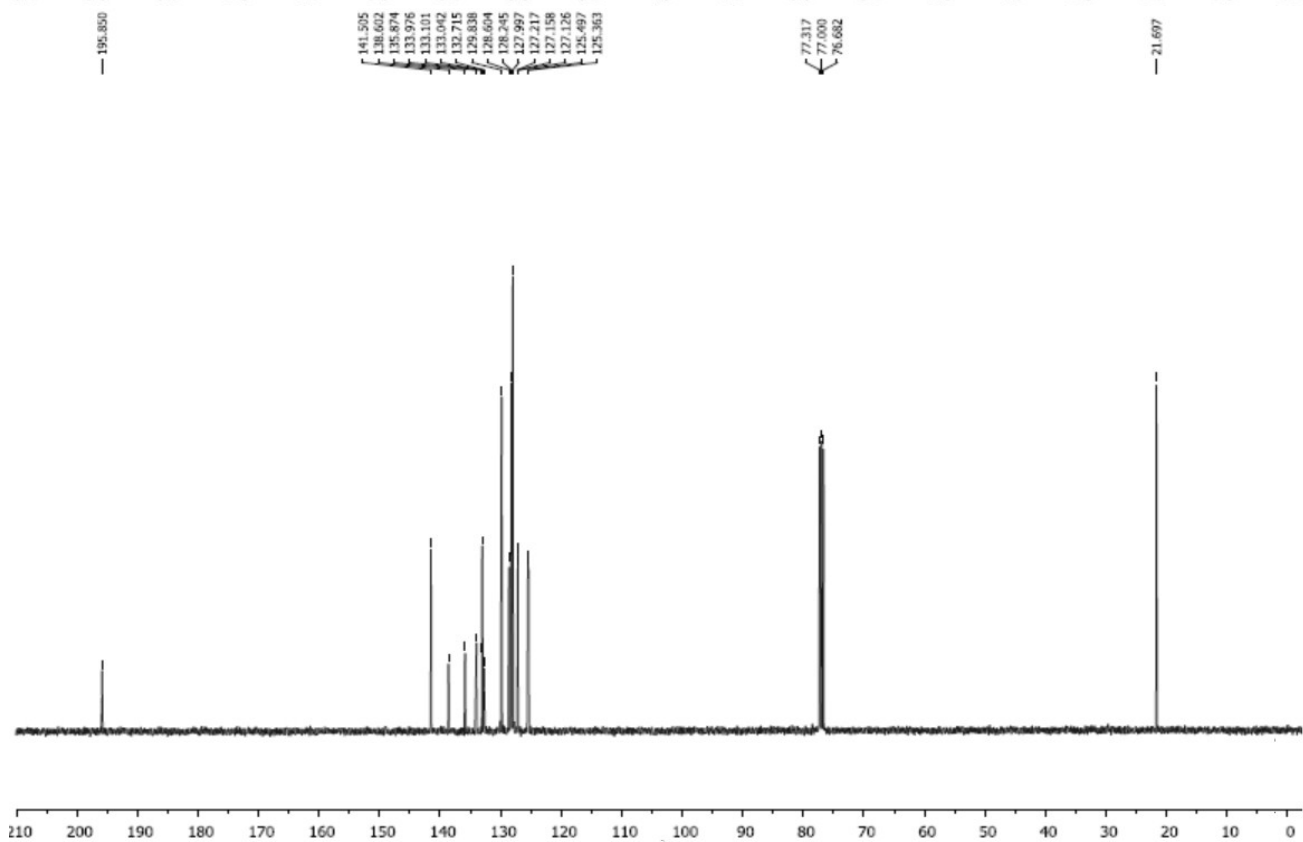

3s

8.352  
8.330  
8.322  
8.300  
8.178  
8.128  
8.023  
8.019  
8.000  
7.755  
7.753  
7.735  
7.732  
7.630  
7.568  
7.547  
7.385  
6.751

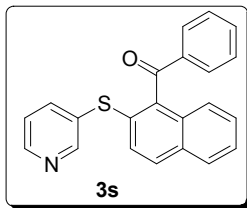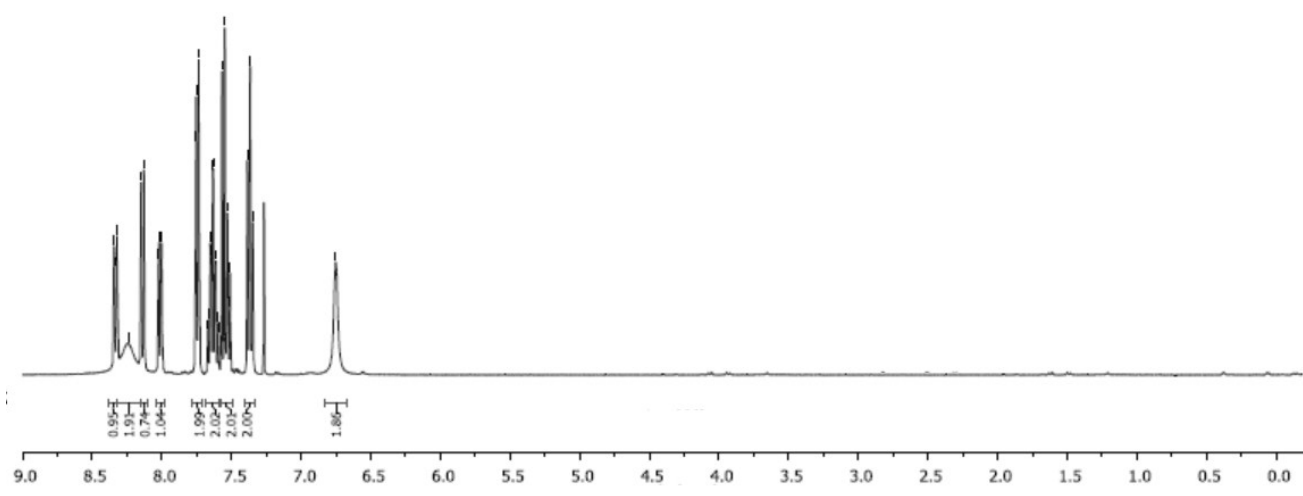

196.250  
148.989  
148.639  
145.470  
136.764  
134.289  
134.168  
133.594  
131.601  
128.722  
128.508  
128.656  
128.466  
127.646  
125.819  
124.286  
122.703  
77.318  
77.000  
76.682

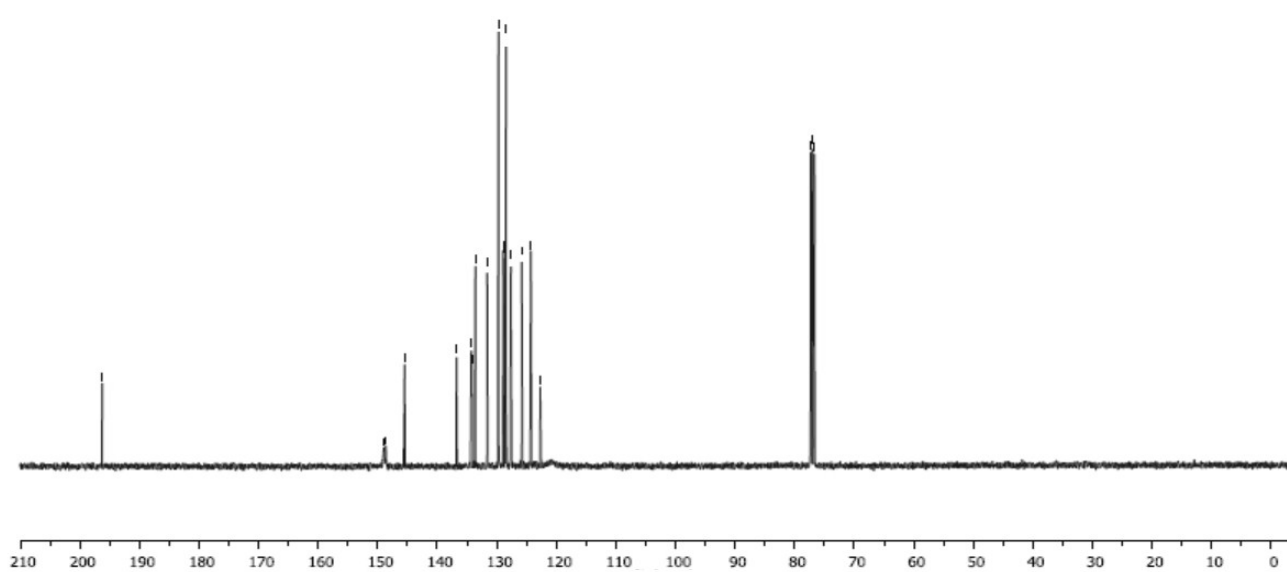

3t

8.721  
8.670  
7.985  
7.965  
7.935  
7.915  
7.896  
7.806  
7.699  
7.696  
7.682  
7.678  
7.675  
7.661  
7.657  
7.622  
7.619  
7.602  
7.599  
7.591  
7.588  
7.585  
7.582  
7.569  
7.554  
7.551  
7.548  
7.443  
7.438  
7.422  
7.400  
7.260  
7.110  
7.107  
7.097  
7.094  
6.945  
6.942  
6.936  
6.766  
6.757  
6.743

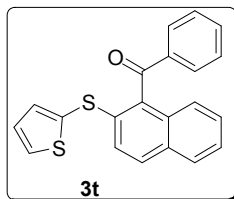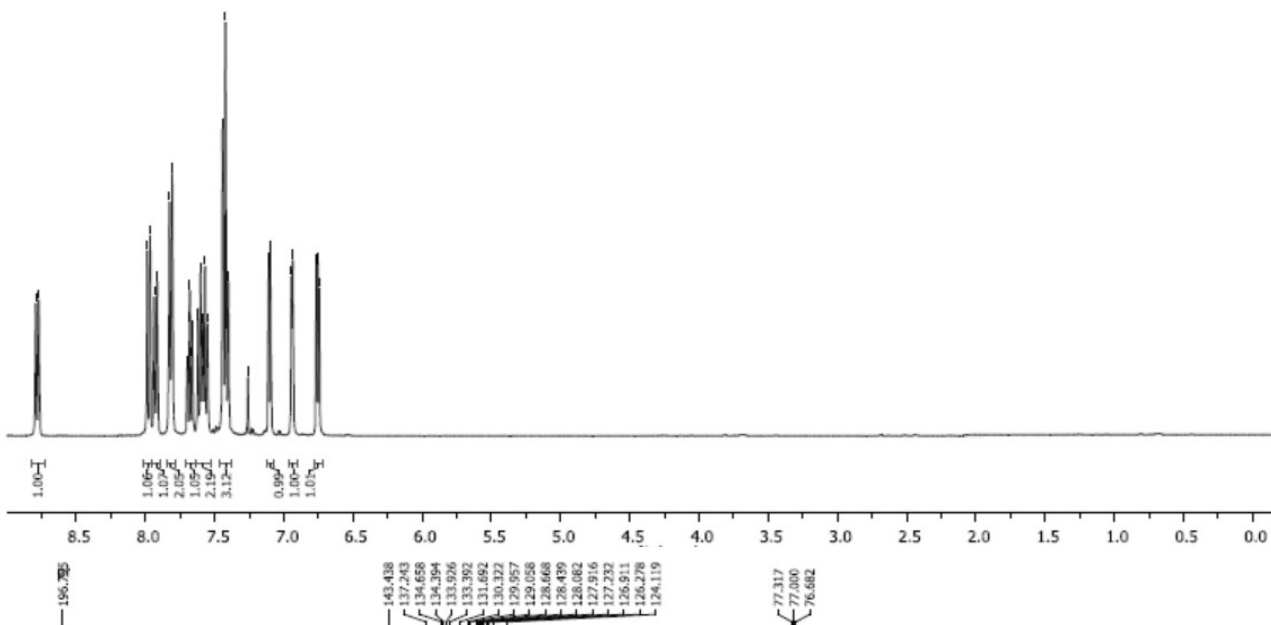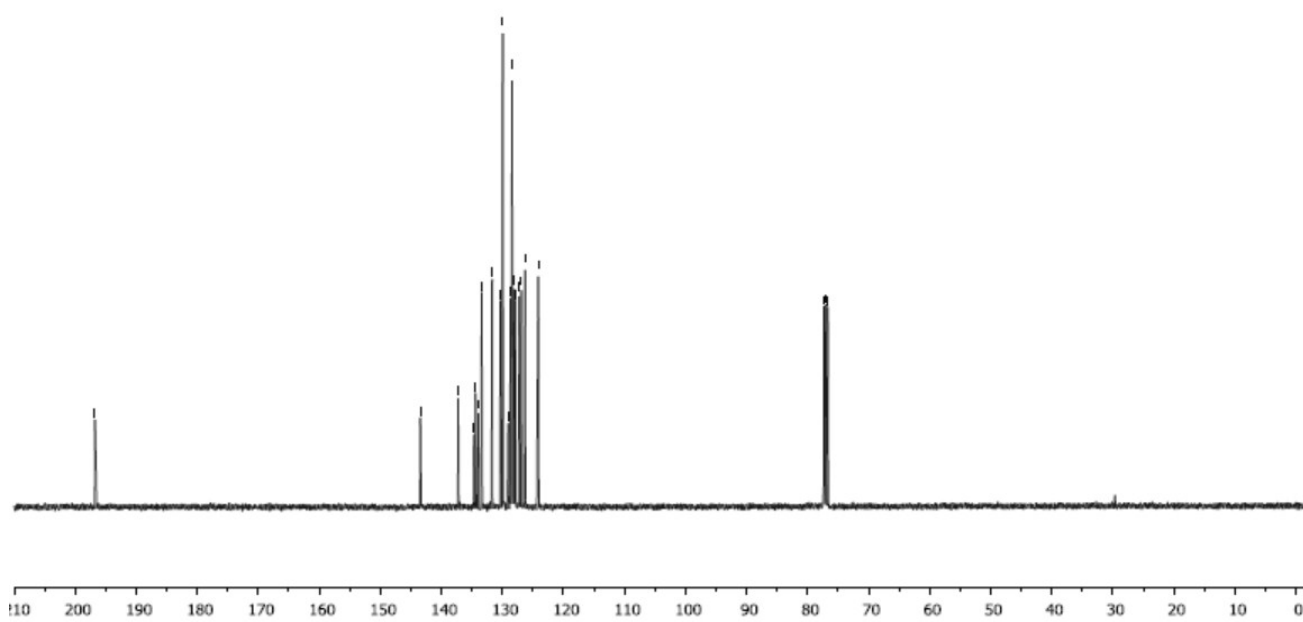

**3u**

8.5295  
8.5154  
8.0772  
7.9884  
7.9831  
7.9823  
7.7919  
7.7771  
7.7688  
7.6887  
7.6770  
7.6664  
7.6654  
7.6505  
7.6591  
7.6588  
7.6668  
7.6661  
7.6523  
7.6522  
7.6541  
7.6532  
7.6526  
7.6524  
7.4817  
7.4819  
7.4520  
7.4113  
7.4019  
7.3983  
7.3888  
7.3775  
7.3696  
7.3690  
7.3469  
7.3445  
7.3325  
7.3086  
7.2900  
7.2600  
7.1111  
7.1107  
7.0590  
7.0885

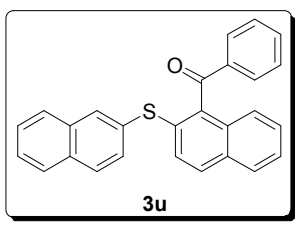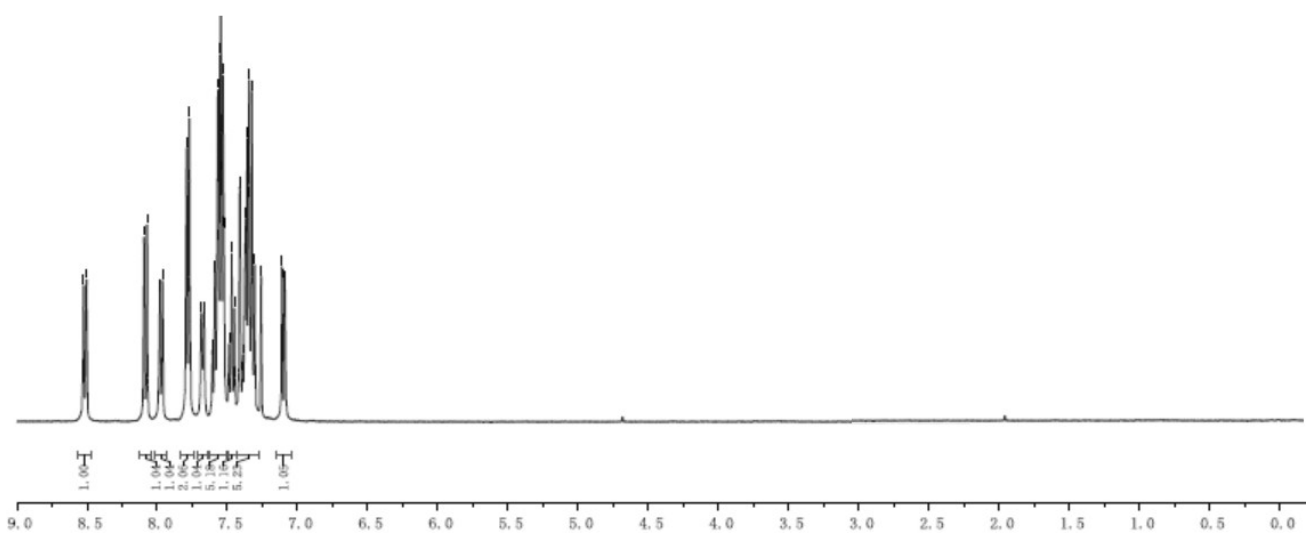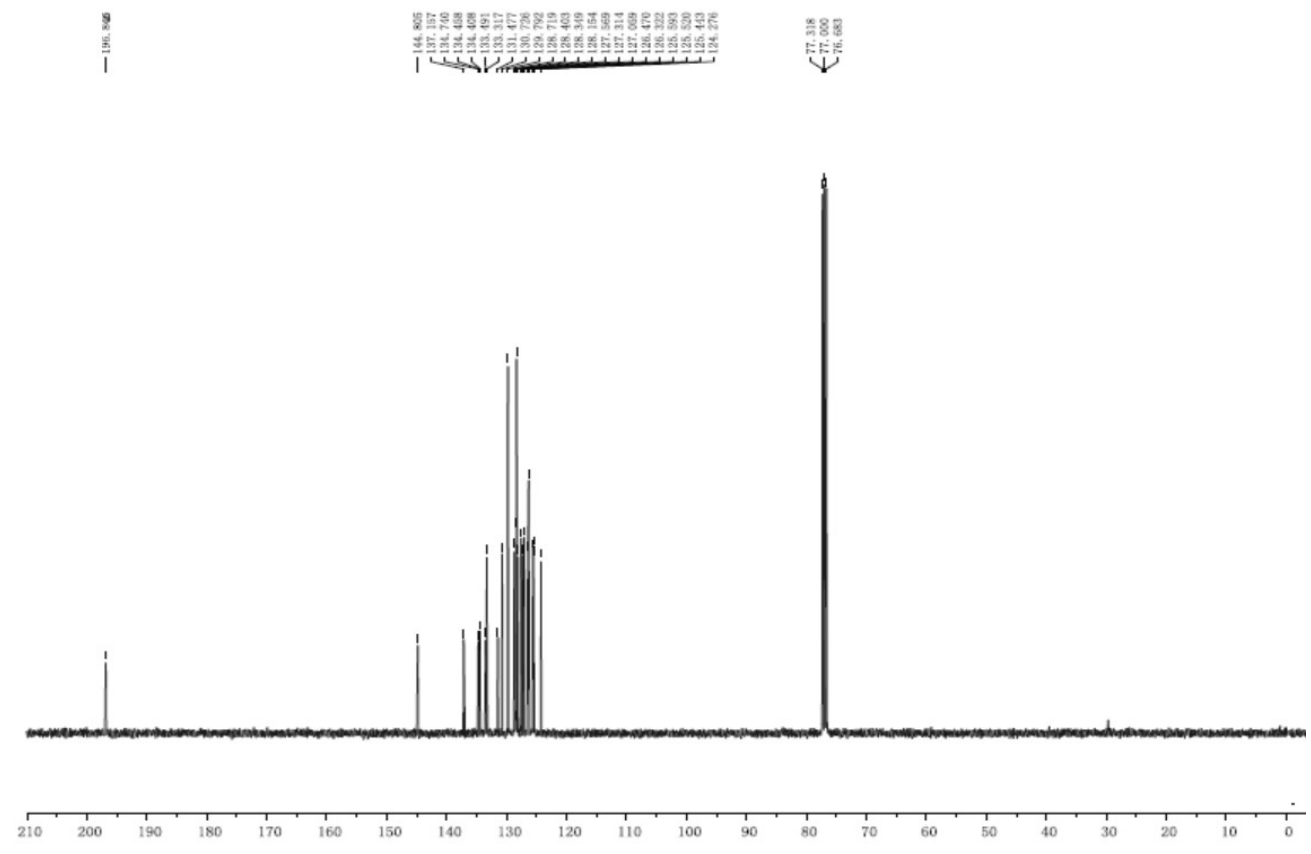

5a

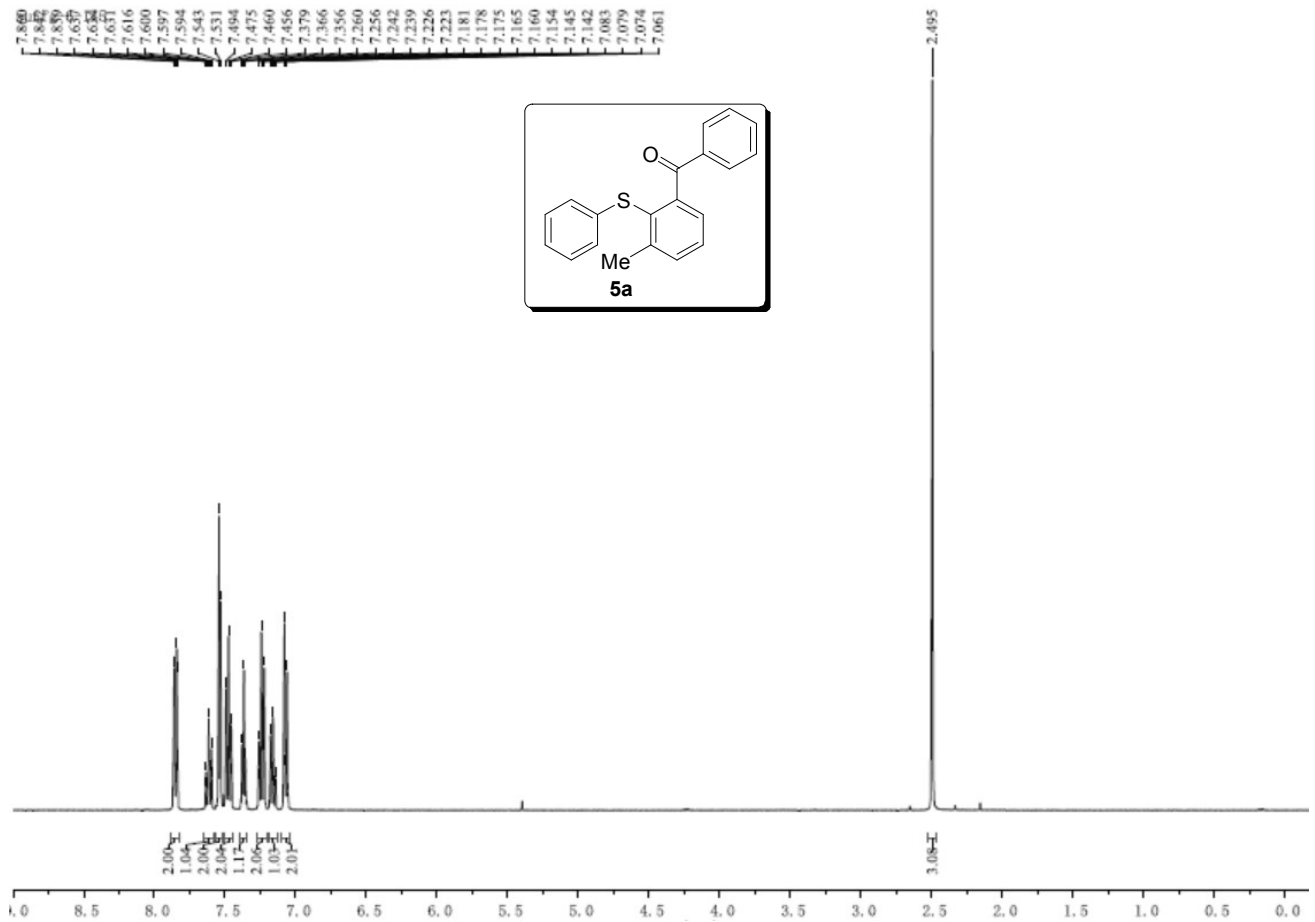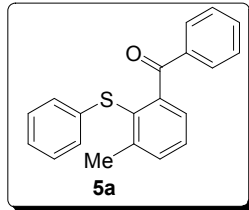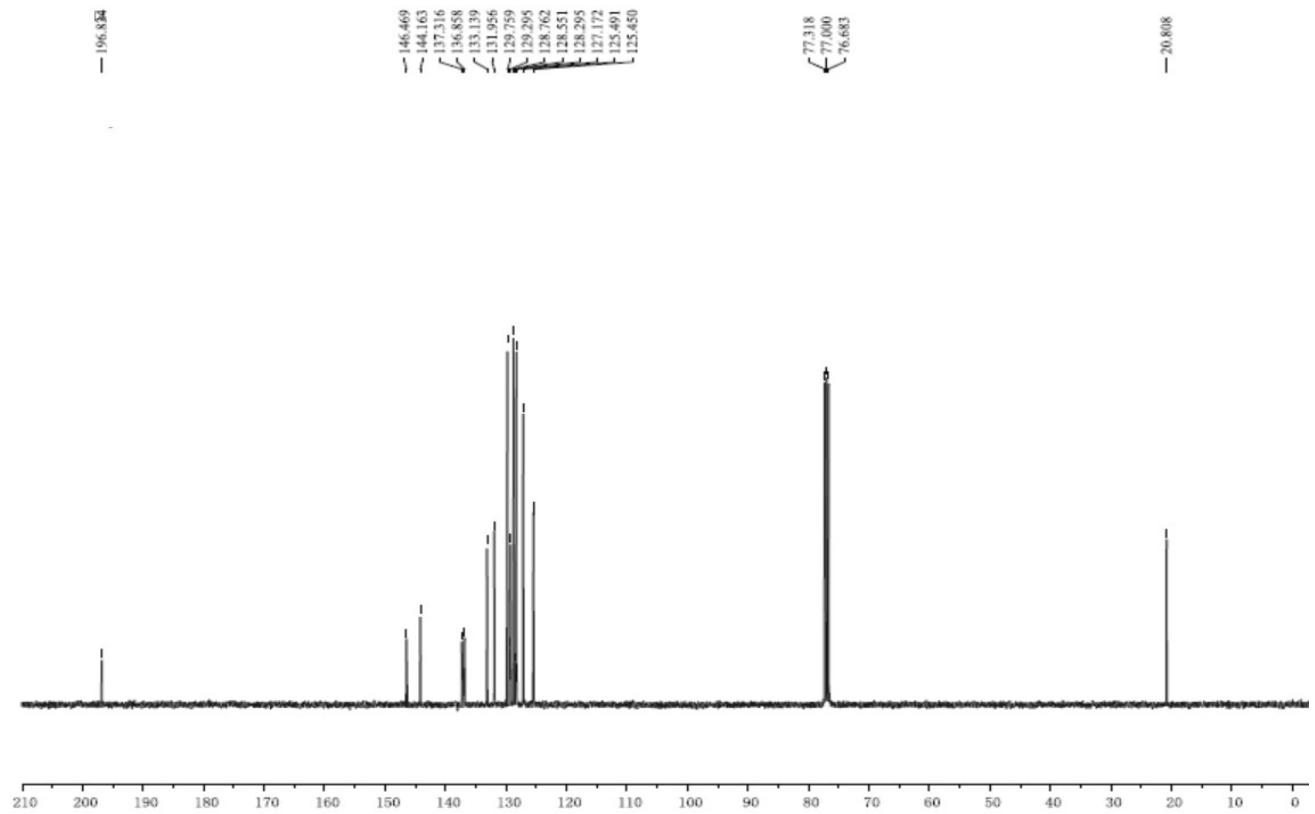

5b

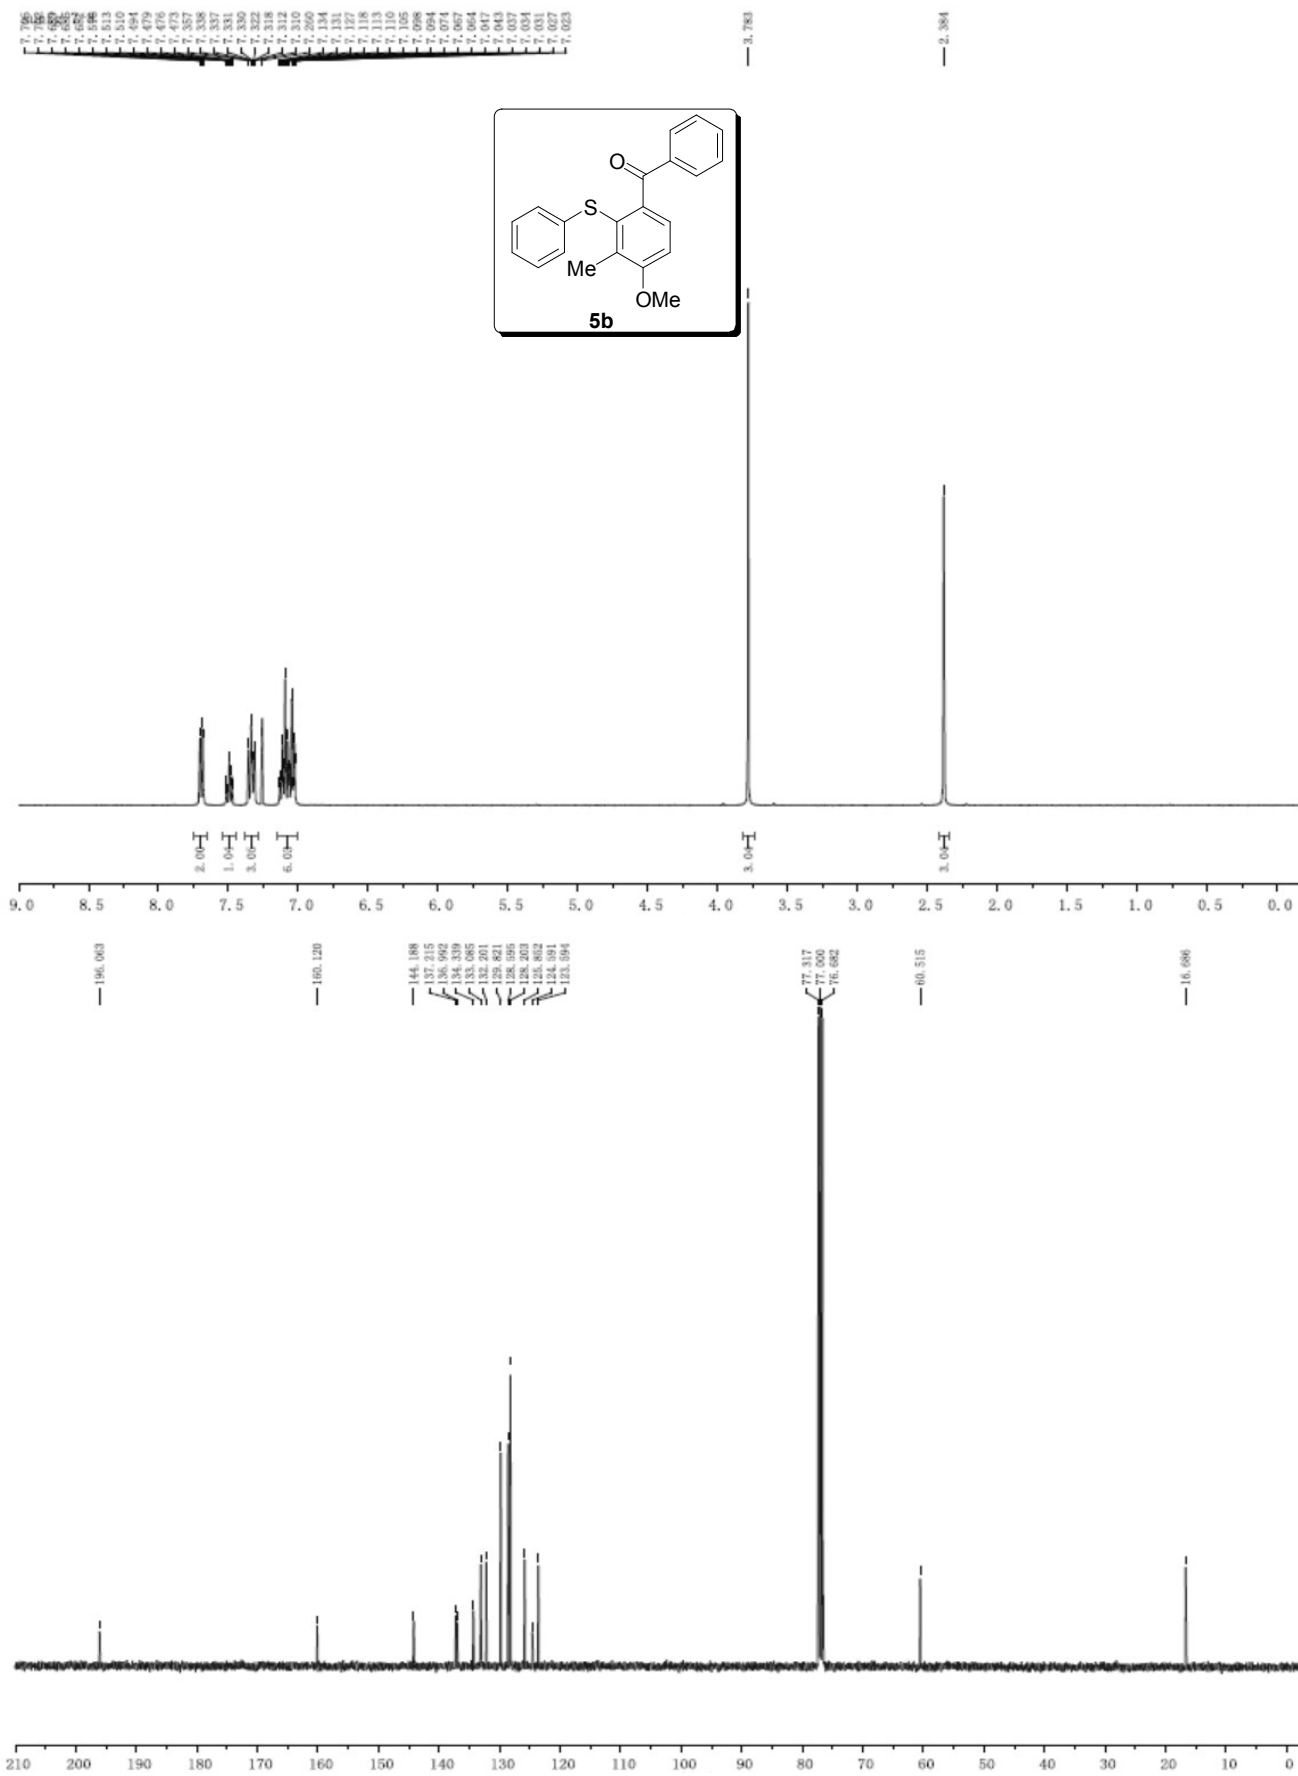

5c

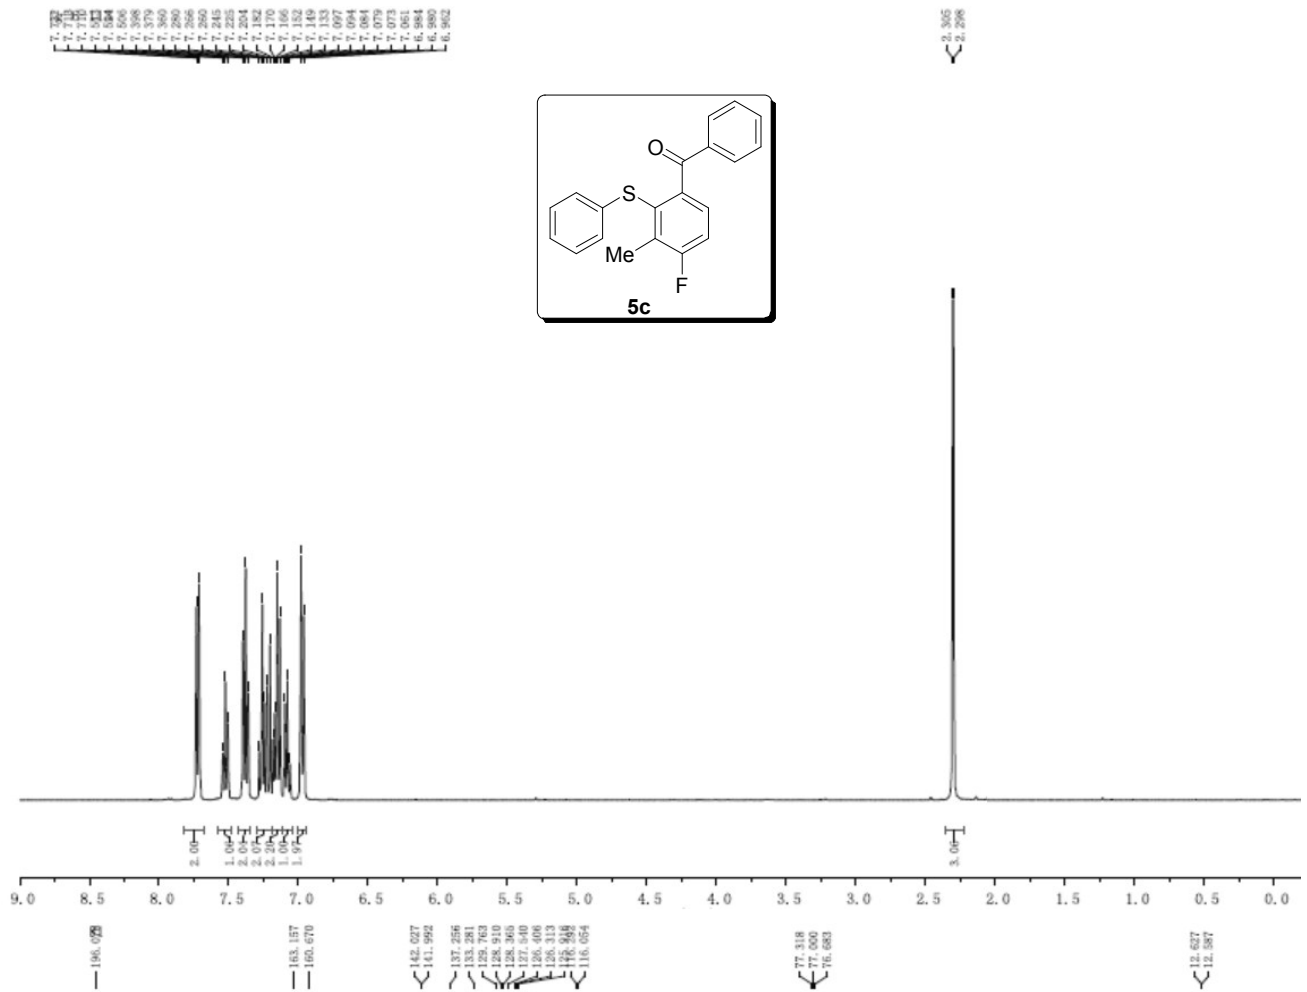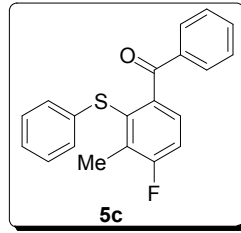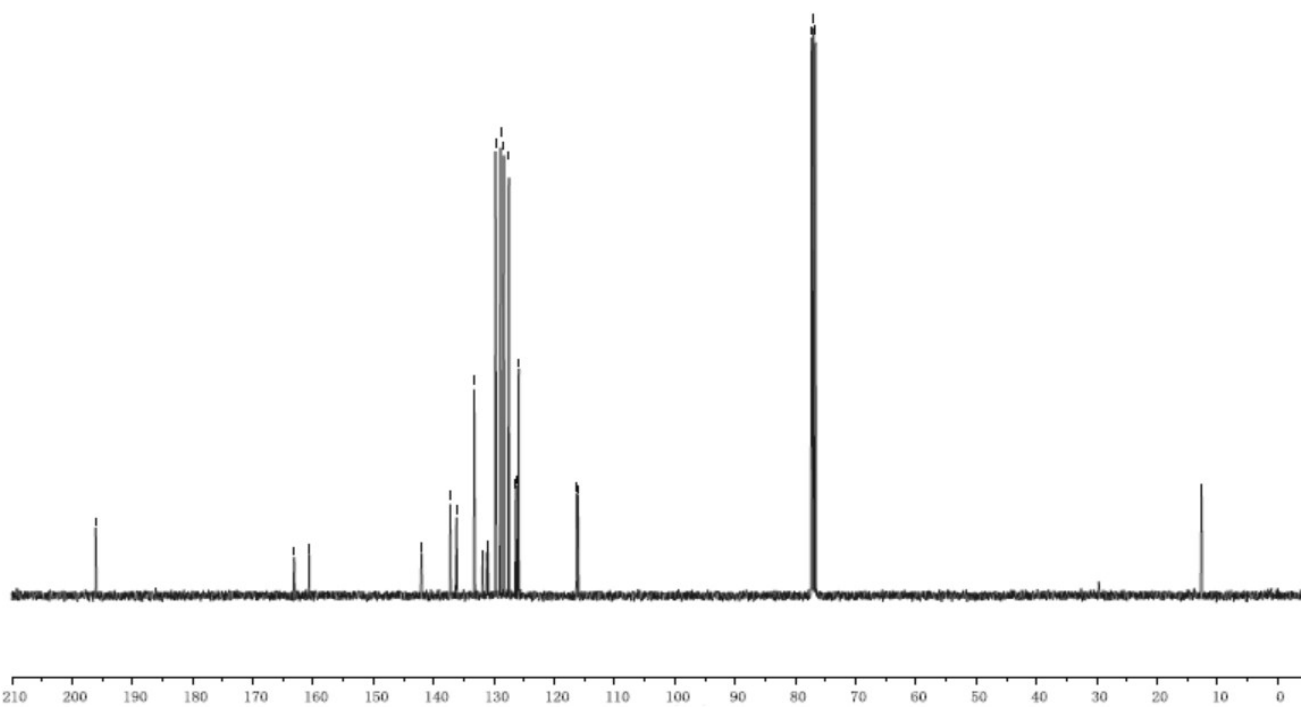

5d



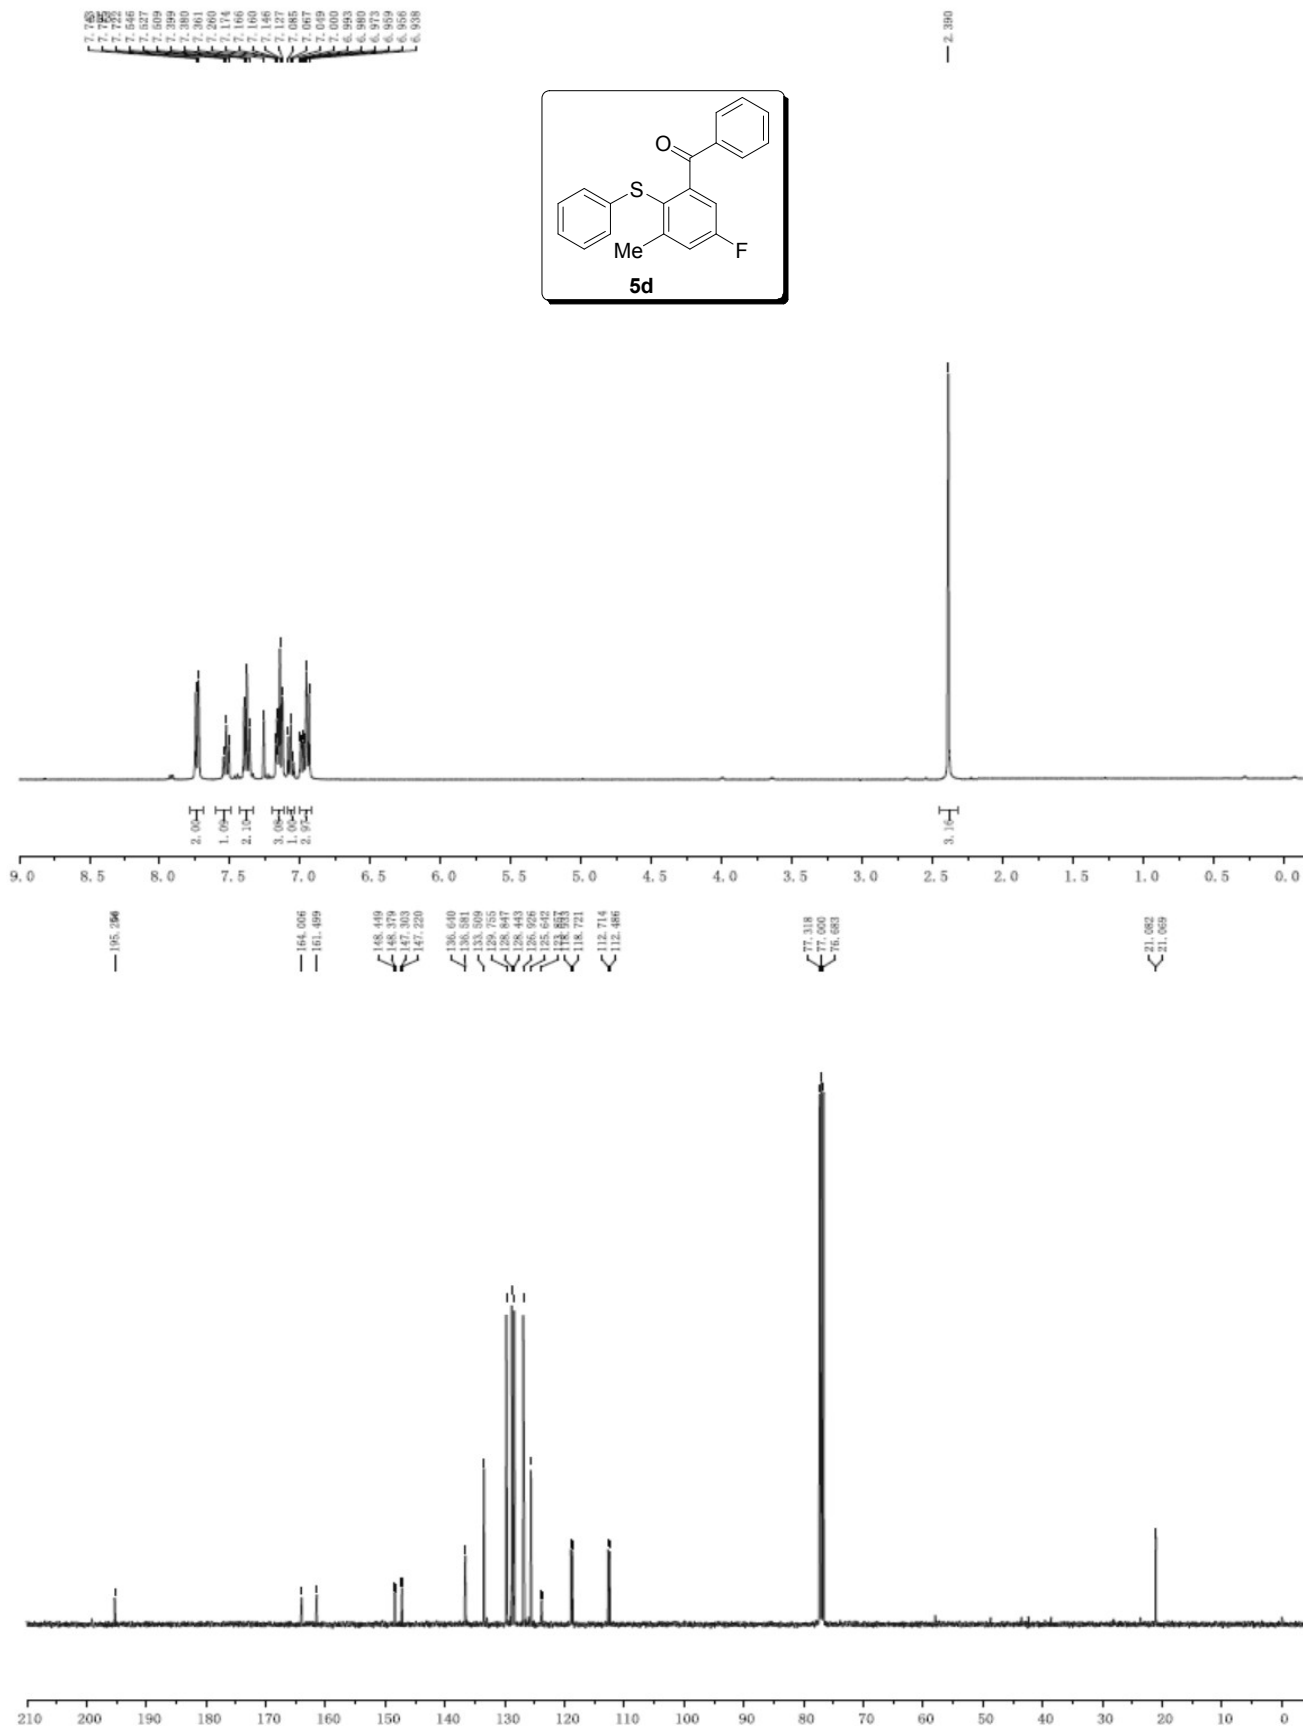

5e



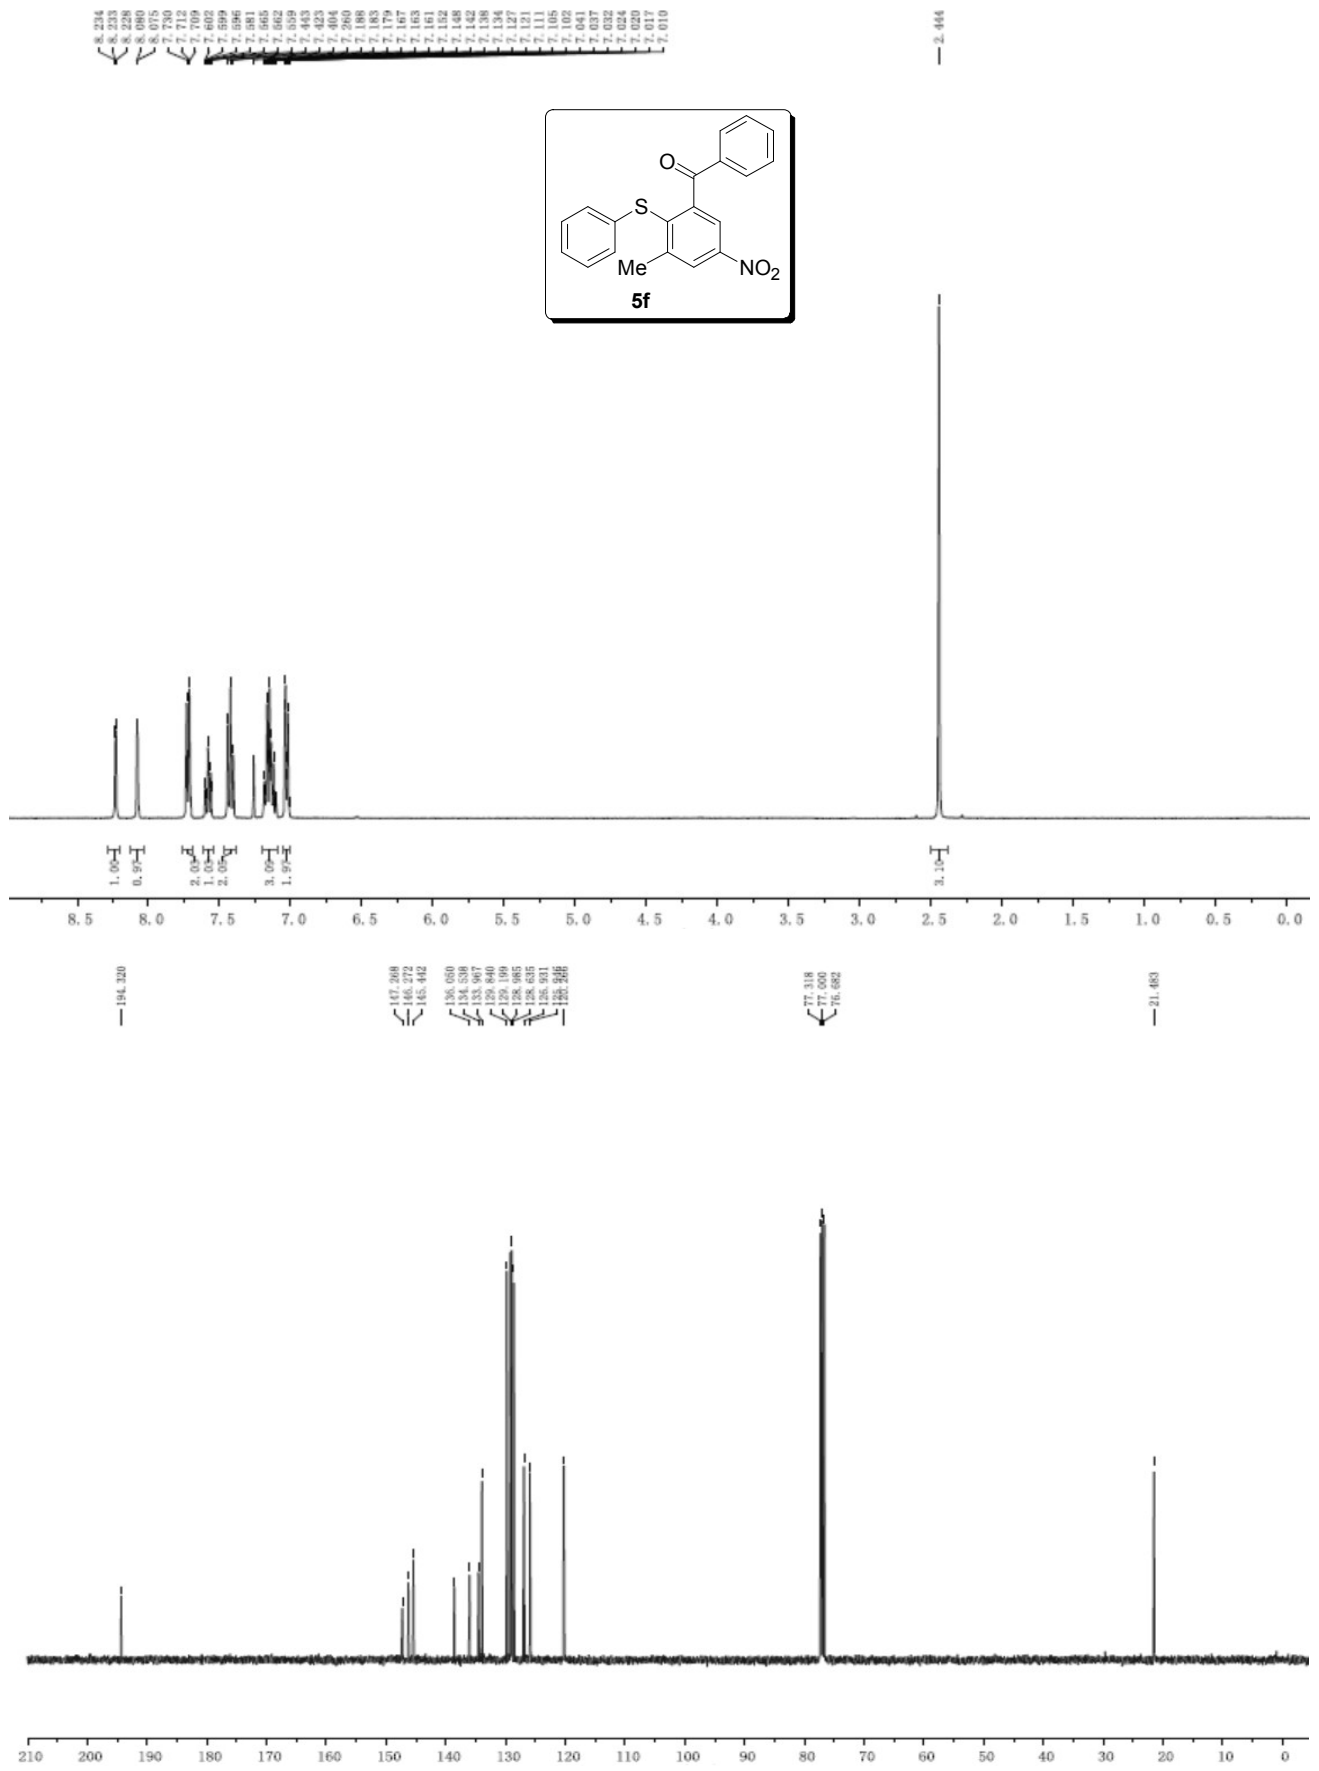

5g

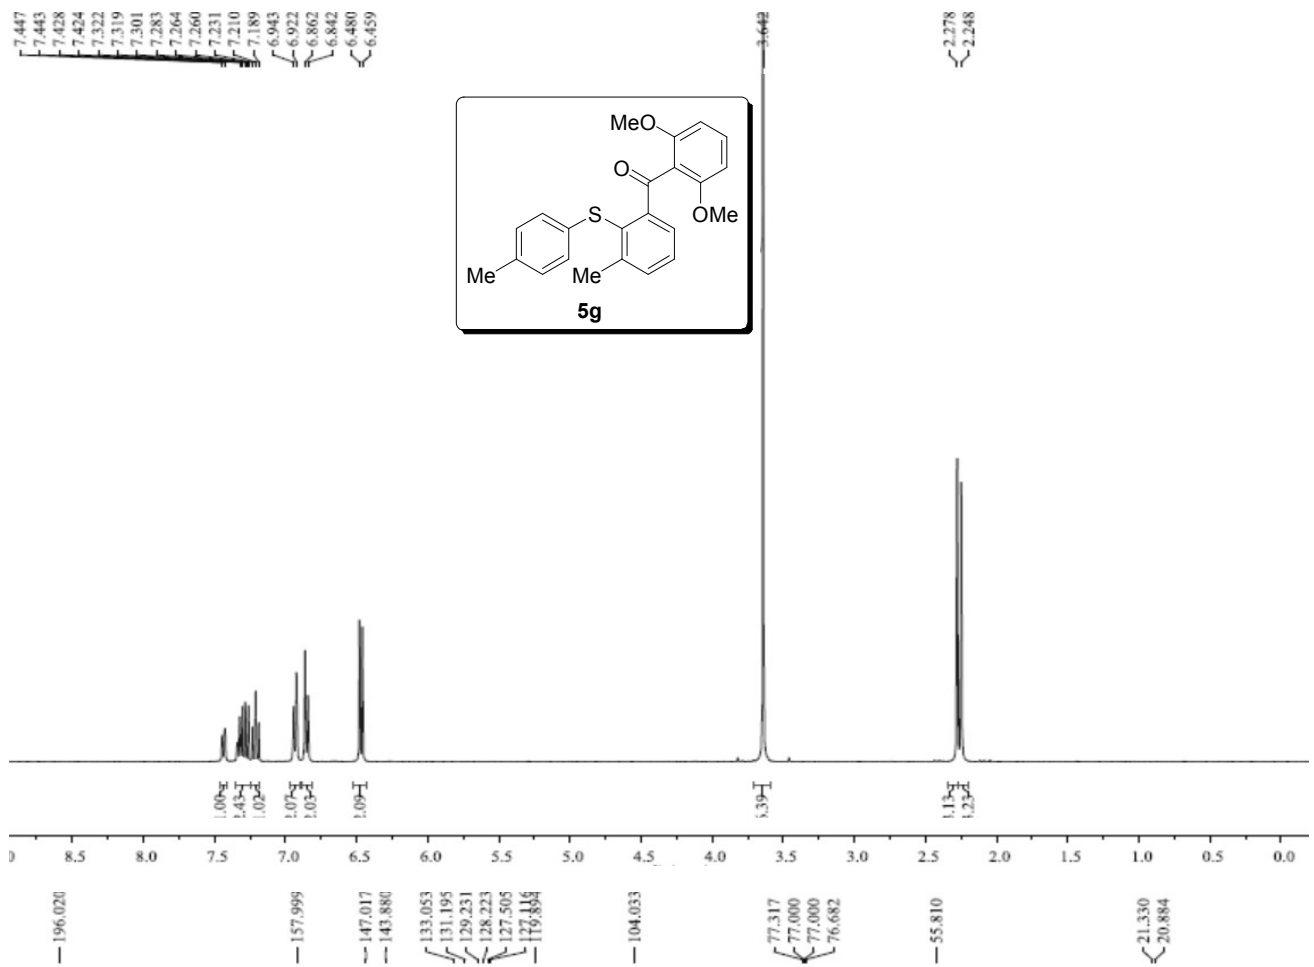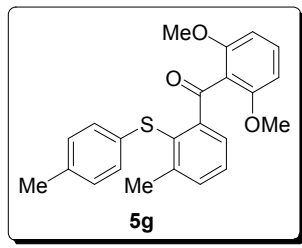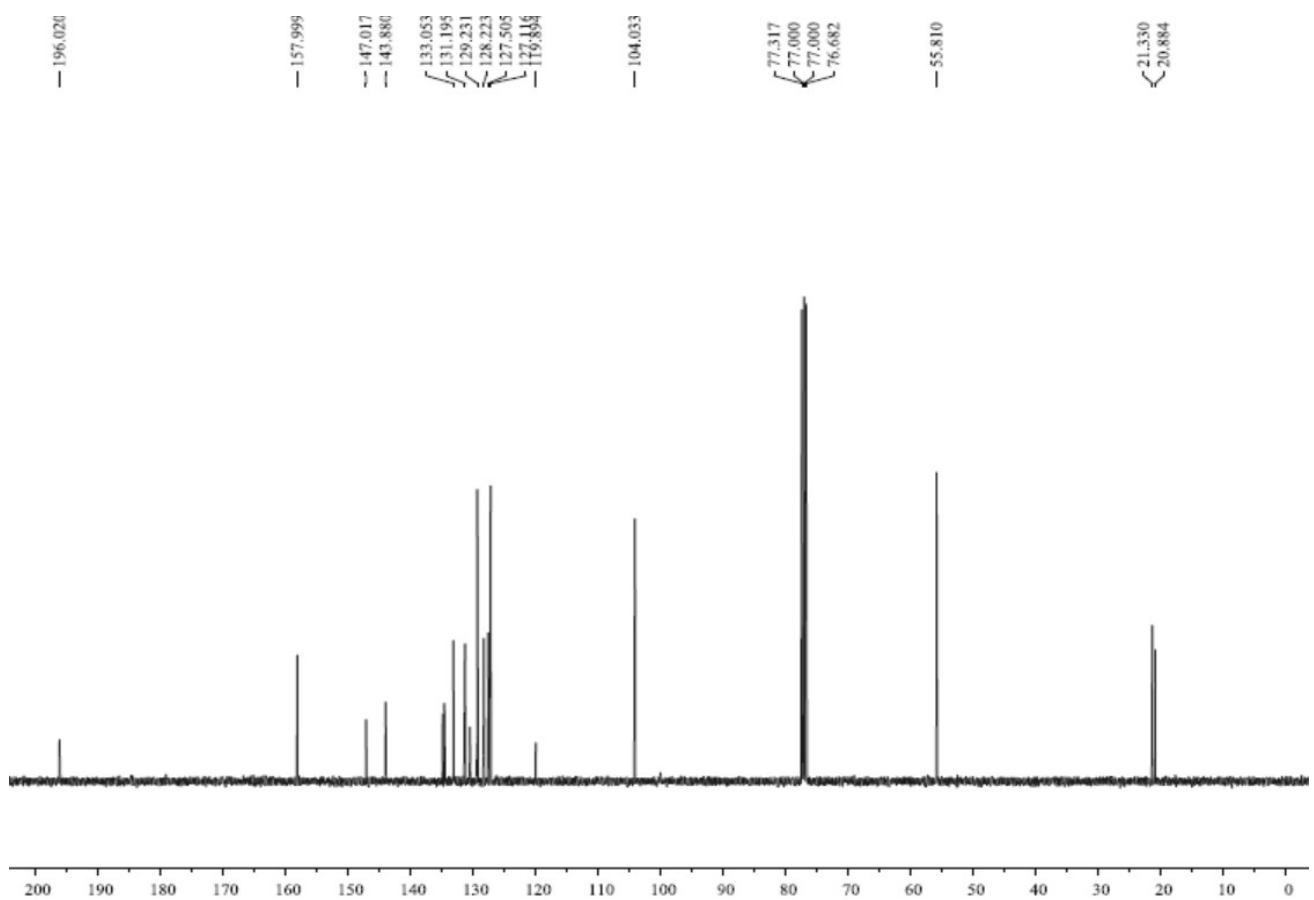

Supplement: c7ra01403a1.pdf [file c7ra01403a1.pdf]
